1 **The *lhfp15* ohnologs *lhfp15a* and *lhfp15b* are required for**  
2 **mechanotransduction in distinct populations of sensory hair cells in**  
3 **zebrafish.**

4 **Timothy Erickson<sup>1, 2\*</sup>, Itallia V. Pacentine<sup>2</sup>, Alexandra Venuto<sup>1</sup>, Rachel Clemens<sup>2</sup>, and Teresa**  
5 **Nicolson<sup>2, 3</sup>**

6 <sup>1</sup> Department of Biology, East Carolina University, Greenville, NC, USA.

7 <sup>2</sup> Vollum Institute and Oregon Hearing Research Center, OHSU, Portland, OR, USA.

8 <sup>3</sup> Current address: Otolaryngology-Head & Neck Surgery, Stanford School of Medicine, Stanford, CA,  
9 USA

10 **\* Correspondence:**

11 Dr. Timothy Erickson, Department of Biology, East Carolina University, Greenville, NC, USA.  
12 [ericksonti17@ecu.edu](mailto:ericksonti17@ecu.edu)

13 **Keywords: hair cell, mechanotransduction, deafness, lateral line, zebrafish, LHFPL5, TMC1,**  
14 **PCDH15**

15 **Article type**

16 Original Research

17 **1 Abstract**

18 Hair cells sense and transmit auditory, vestibular, and hydrodynamic information by converting  
19 mechanical stimuli into electrical signals. This process of mechano-electrical transduction (MET)  
20 requires a mechanically-gated channel localized in the apical stereocilia of hair cells. In mice, lipoma  
21 HMGIC fusion partner-like 5 (LHFPL5) acts as an auxiliary subunit of the MET channel whose  
22 primary role is to correctly localize PCDH15 and TMC1 to the mechanotransduction complex.  
23 Zebrafish have two *lhfp15* genes (*lhfp15a* and *lhfp15b*), but their individual contributions to MET  
24 channel assembly and function have not been analyzed.

25 Here we show that the zebrafish *lhfp15* genes are expressed in discrete populations of hair cells: *lhfp15a*  
26 expression is restricted to auditory and vestibular hair cells in the inner ear, while *lhfp15b* expression  
27 is specific to hair cells of the lateral line organ. Consequently, *lhfp15a* mutants exhibit defects in  
28 auditory and vestibular function, while disruption of *lhfp15b* affects hair cells only in the lateral line  
29 neuromasts. In contrast to previous reports in mice, localization of Tmc1 does not depend upon Lhfp15  
30 function in either the inner ear or lateral line organ. In both *lhfp15a* and *lhfp15b* mutants, GFP-tagged  
31 Tmc1 and Tmc2b proteins still localize to the stereocilia of hair cells. Using a stably integrated GFP-  
32 Lhfp15a transgene, we show that the tip link cadherins Pcdh15a and Cdh23, along with the Myo7aa  
33 motor protein, are required for correct Lhfp15a localization at the tips of stereocilia. Our work  
34 corroborates the evolutionarily conserved co-dependence between Lhfp15 and Pcdh15, but also reveals  
35 novel requirements for Cdh23 and Myo7aa to correctly localize Lhfp15a. In addition, our data suggest  
36 that targeting of Tmc1 and Tmc2b proteins to stereocilia in zebrafish hair cells occurs independently  
37 of Lhfp15 proteins.

## 38 2 Introduction

39 The mechano-electrical transduction (MET) complex of sensory hair cells is an assembly of proteins  
40 and lipids that facilitate the conversion of auditory, vestibular and hydrodynamic stimuli into electrical  
41 signals. Our current understanding is that the proteins of the MET complex consist of the tip link  
42 proteins cadherin 23 (CDH23) and protocadherin 15 (PCDH15) at the upper and lower ends of the tip  
43 link respectively (Kazmierczak et al., 2007), the pore-forming subunits transmembrane channel-like  
44 proteins TMC1 and TMC2 (Kawashima et al., 2011; Pan et al., 2013, 2018), and the accessory subunits  
45 transmembrane inner ear (TMIE) and lipoma HMGIC fusion partner-like 5 (LHFPL5) (Cunningham  
46 and Müller, 2019; Xiong et al., 2012; Zhao et al., 2014). How these proteins are correctly localized to  
47 the sensory hair bundle and assemble into a functional complex is a fundamental question for  
48 understanding the molecular basis of how mechanotransduction occurs.

49 Recent studies have revealed extensive biochemical interactions between the MET complex proteins  
50 that are required for the function and / or stable integration of each component in the complex. In  
51 particular, LHFPL5 is a central player in MET complex formation, stability, and function. LHFPL5  
52 (a.k.a. tetraspan membrane protein of the hair cell stereocilia / TMHS) is a four transmembrane domain  
53 protein from the superfamily of tetraspan junctional complex proteins. This superfamily includes  
54 junctional proteins like claudins and connexins, as well as ion channel auxiliary subunits such as  
55 transmembrane  $\alpha$ -amino-3-hydroxy-5-methyl-4-isoxazole propionic acid receptor (AMPA)  
56 regulatory proteins (TARPs) and the gamma subunits of voltage gated calcium channels. Pathogenic  
57 mutations in LHFPL5 are a cause of non-syndromic sensorineural hearing loss in humans (DFNB67),  
58 mice and zebrafish (Longo-Guess et al., 2005; Nicolson et al., 1998; Obholzer et al., 2012; Shabbir et  
59 al., 2006). LHFPL5 localizes to the tips of stereocilia (Li et al., 2019; Mahendrasingam et al., 2017;  
60 Xiong et al., 2012) where it directly interacts with other MET complex components. Co-  
61 immunoprecipitation experiments in heterologous cells suggests that LHFPL5 can directly interact  
62 with PCDH15 and TMIE (Xiong et al., 2012; Zhao et al., 2014). A structure of the PCDH15 - LHFPL5  
63 complex has also been reported (Ge et al., 2018).

64 A precise role for LHFPL5 has yet to be defined. One current hypothesis is that LHFPL5 acts as an  
65 auxiliary subunit of the MET channel to stabilize the complex, similar to TARPs and the gamma  
66 subunits of voltage-gated calcium channels. In mouse cochlear hair cells, PCDH15 and LHFPL5  
67 require each other for stable localization at the tips of stereocilia (Mahendrasingam et al., 2017; Xiong  
68 et al., 2012), consistent with their well-defined biochemical interaction. The partial loss of PCDH15  
69 from the stereocilia explains the observed reduction in the number of tip links and the dysmorphic hair  
70 bundles in *Lhfp15*<sup>-/-</sup> hair cells. Interestingly, although experiments have failed to demonstrate a  
71 biochemical interaction between LHFPL5 and the TMCs, LHFPL5 is required for the localization of  
72 TMC1, but not TMC2, in the hair bundle of mouse cochlear hair cells (Beurg et al., 2015). Consistent  
73 with this finding, the researchers identified a residual TMC2-dependent MET current in *Lhfp15* mutant  
74 mice. The basis for the selective loss of TMC1 is not known.

75 In zebrafish, *Lhfp15a* plays a similar role in mechanotransduction as its mammalian counterparts. A  
76 mutation in zebrafish *lhfp15a* was reported in a forward genetic screen for genes required for hearing  
77 and balance (Nicolson et al., 1998; Obholzer et al., 2012). The loss of *Lhfp15a* disrupts the targeting of  
78 *Pcdh15a* to stereocilia and results in splayed hair bundles (Maeda et al., 2017). However, *Lhfp15a* is  
79 not required to correctly localize *Tmie* and vice versa (Pacentine and Nicolson, 2019), in spite of their  
80 biochemical interaction in cultured cells (Xiong et al., 2012). *Lhfp15* still localizes to the tips of  
81 stereocilia in *Tmc1/Tmc2* double mutants (Beurg et al., 2015), as well as *transmembrane O-*  
82 *methyltransferase (tomt)* mouse and zebrafish mutants, which fail to traffic TMCs to the hair bundle

83 (Cunningham et al., 2017; Erickson et al., 2017). This phenotype suggests that Lhfp15 localization does  
84 not require the TMCs. However, a number of questions regarding the functions of Lhfp15 remain  
85 unanswered: 1) In zebrafish, what are the molecular requirements for targeting Lhfp15a to the hair  
86 bundle? 2) Is the Lhfp15-dependent targeting of Tmc1 to the hair bundle an evolutionarily-conserved  
87 aspect of their interaction? 3) *lhfp15a* mutants have defects in auditory and vestibular behaviors, yet  
88 sensory hair cells of the lateral line are unaffected (Nicolson et al., 1998). What is the genetic basis for  
89 the persistence of lateral line function in *lhfp15a* mutants?

90 In this work, we report that teleost fish have two *lhfp15* genes, *lhfp15a* and *lhfp15b*. The zebrafish *lhfp15*  
91 ohnologs are expressed in distinct populations of larval sensory hair cells: *lhfp15a* in the auditory and  
92 vestibular system; *lhfp15b* in the hair cells of the lateral line organ. Their divergent expression patterns  
93 explain why lateral line hair cells are still mechanically-sensitive in *lhfp15a* mutants. CRISPR-Cas 9  
94 knockout of *lhfp15b* alone silences the lateral line organ but has no effect on otic hair cell function. We  
95 also show that neither Lhfp15a nor Lhfp15b are required for Tmc localization in stereocilia.  
96 Additionally, we use a GFP-tagged Lhfp15a to demonstrate that Myo7aa and the tip link proteins Cdh23  
97 and Pcdh15a are required for proper Lhfp15a localization in otic hair cell bundles. This study reveals  
98 the subfunctionalization of the zebrafish *lhfp15* ohnologs through the divergence in their expression  
99 patterns. Furthermore, our work complements previous results from murine cochlear hair cells by  
100 highlighting a conserved association between Lhfp15 and Pcdh15, but also demonstrating novel  
101 requirements for Cdh23 and Myo7aa in localizing Lhfp15a. Lastly, our work indicates that Lhfp15-  
102 dependent localization of Tmc1 is not a universal feature of sensory hair cells and that Lhfp15 proteins  
103 are required for mechanotransduction independently of a role in localizing the Tmc channel subunits  
104 to stereocilia.

### 105 **3 Materials and Methods**

#### 106 **3.1 Ethics statement**

107 Animal research complied with guidelines stipulated by the Institutional Animal Care and Use  
108 Committees at Oregon Health and Science University (Portland, OR, USA) and East Carolina  
109 University (Greenville, NC, USA). Zebrafish (*Danio rerio*) were maintained and bred using standard  
110 procedures (Westerfield, 2000).

#### 111 **3.2 Mutant and transgenic fish lines**

112 The following zebrafish mutant alleles were used for this study: *cdh23<sup>nl9</sup>*, *cdh23<sup>tj264</sup>*, *lhfp15a<sup>tm290d</sup>*,  
113 *lhfp15b<sup>vo35</sup>*, *myo7aa<sup>ty220</sup>*, *pcdh15a<sup>psi7</sup>*, *pcdh15a<sup>th263b</sup>* (Erickson et al., 2017; Ernest et al., 2000; Maeda et  
114 al., 2017; Nicolson et al., 1998; Obholzer et al., 2012). The transgenic lines used in this study were  
115 *Tg(-6myo6b:eGFP-lhfp15a)vo23Tg*, *Tg(-6myo6b:tmc1-emGFP)vo27Tg*, *Tg(-6myo6b:tmc2b-*  
116 *emGFP)vo28Tg* (Erickson et al., 2017), and *Tg(-6myo6b:eGFP-pA)vo68Tg*. All experiments used  
117 larvae at 1–7 dpf, which are of indeterminate sex at this stage.

#### 118 **3.3 Genotyping**

119 Standard genomic PCR followed by Sanger sequencing was used to identify *cdh23<sup>tj264</sup>*, *cdh23<sup>nl9</sup>*,  
120 *lhfp15a<sup>tm290d</sup>*, *pcdh15a<sup>psi7</sup>*, and *pcdh15a<sup>th263b</sup>* alleles. The *lhfp15b<sup>vo35</sup>* mutation disrupts a MluCI  
121 restriction site (AATT) and we are able to identify *lhfp15b<sup>vo35</sup>* hetero- and homozygotes based on the  
122 different sizes of MluCI-digested PCR products resolved on a 1.5% agarose gel. The following primers  
123 were used for genotyping:

- 124 *cdh23<sup>n19</sup>*: Fwd – CCACAGGAATTCTGGTGTCC, Rvs – GAAAGTGGGCGTCTCATCAT;
- 125 *cdh23<sup>y264</sup>*: Fwd – GGACGTCAGTGTTTCATGGTG, Rvs – TTTTCTGACCGTGGCATTAAAC;
- 126 *lhfp15a<sup>tm290d</sup>*: Fwd – GGACCATCATCTCCAGCAAAC, Rvs –  
127 CACGAAACATATTTTCACTCACCAG;
- 128 *lhfp15b<sup>vo35</sup>*: Fwd – GCGTCATGTGGGCAGTTTTTC, Rvs – TAGACACTAGCGGCGTTGC;
- 129 *myo7a<sup>ty220</sup>*: Fwd – TAGGTCCTCTTTAATGCATA, Rvs –  
130 GTCTGTCTGTCTGTCTATCTGTCTCGCT;
- 131 *pcdh15a<sup>psi7</sup>*: Fwd – TTGGCACCACTATCTTTACCG, Rvs – ACAGAAGGCACCTGGAAAAC;
- 132 *pcdh15a<sup>th263b</sup>*: Fwd – AGGGACTAAGCCGAAGGAAG, Rvs –  
133 CACTCATCTTCACAGCCATACAG.

### 134 **3.4 Phylogeny**

135 Lhfp15 protein sequences retrieved from either NCBI or Ensembl (Supplemental Table 1).  
136 Phylogenetic analysis was done on [www.phylogeny.fr](http://www.phylogeny.fr) using T-Coffee (multiple sequence alignment),  
137 GBLOCKS (alignment curation), PhyML (maximum likelihood tree construction with 100 replicates to  
138 estimate bootstrap values), and TreeDyn (visualization) (Dereeper et al., 2008).

### 139 **3.5 mRNA *in situ* hybridization**

140 *lhfp15a* and *lhfp15b* probe templates were amplified from total RNA using the following primers:  
141 *lhfp15a* Fwd: AATATTGGTGCATAGACTCAAGGAGG; Rvs:  
142 GACTCCAAAATGACCTTTTAAACAAACGC. *lhfp15b* Fwd:  
143 TGAAGATCAGCTACGATATAACCGG; Rvs: ACTGTGATTGGTGTATTTCCAGC. The inserts  
144 were cloned into the pCR4 vector for use in probe synthesis. mRNA *in situ* probe synthesis and  
145 hybridization was performed essentially as previously described (Erickson et al., 2010; Thisse and  
146 Thisse, 2008). Stained specimens were mounted on a depression slide in 1.2 % low-melting point  
147 agarose and imaged on a Leica DMLB microscope fitted with a Zeiss AxioCam MRc 5 camera using  
148 Zeiss AxioVision acquisition software (Version 4.5).

### 149 **3.6 Immunofluorescent staining, FM dye labeling, and fluorescence microscopy**

150 Anti-Pcdh15a immunostaining and FM dye labeling of inner ear and lateral line hair cells were  
151 performed as previously described (Erickson et al., 2017). All fluorescent imaging was done on Zeiss  
152 LSM 700 or LSM 800 laser scanning confocal microscopes. Z-stacks were analyzed using ImageJ  
153 (Schneider et al., 2012). All related control and experimental images were adjusted equally for  
154 brightness and contrast in Adobe Photoshop CC.

### 155 **3.7 CRISPR-Cas9 knockout of *lhfp15b***

156 An sgRNA targeting the *lhfp15b* sequence 5'- CAACCCAATCACCTCGGAAT-3' was synthesized  
157 essentially as described (Gagnon et al., 2014). For microinjection, 1 µg of sgRNA was mixed with 1  
158 µg of Cas9 protein and warmed to 37°C for 5 minutes to promote the formation of the Cas9-sgRNA  
159 complex. Approximately 2 nl of this solution was injected into wild type embryos at the single-cell  
160 stage. Efficacy of cutting was determined in two ways: 1) Single larvae genotyping - Amplification of

161 the target genomic region by PCR and running the products on 2.5% agarose gels to assay for disruption  
162 of a homogenous amplicon. 2) Assaying for disruption of the mechanotransduction channel in lateral  
163 line hair cells by FM 1-43 dye uptake. Larvae displaying a non-wild type pattern of FM 1-43 dye uptake  
164 were raised to adulthood. Progeny from in-crosses of F0 adults were exposed to FM 1-43 dye to identify  
165 founders. By outcrossing founder adults, we established a line of fish carrying a 5 base pair deletion in  
166 the *lhfp15b* coding region that causes a S77FfsX48 mutation (*lhfp15b*<sup>vo35</sup>). This mutation disrupts the  
167 protein in the first extracellular loop and deletes the final three of four transmembrane helices in  
168 Lhfp15b.

### 169 **3.8 Acoustic startle response**

170 Quantification of the larval acoustic startle response was performed using the Zebrabox monitoring  
171 system (ViewPoint Life Sciences, Montreal, Canada) as previously described (Maeda et al., 2017) with  
172 the following modifications. Each trial included six larvae which were subjected to two or three trials  
173 of 6 acoustic stimuli. For each individual larva, the trial with best AEBR performance was used for  
174 quantification. Positive responses where spontaneous movement occurred in the second prior to the  
175 stimulus were excluded from analysis. Trials where spontaneous movement occurred for more than 6  
176 of the 12 stimuli were also excluded from analysis.

### 177 **3.9 Microphonics**

178 We performed the microphonic measurements as previously described (Pacentine and Nicolson, 2019).  
179 In brief, we anesthetized 3 dpf larvae in extracellular solution (140 mM NaCl, 2 mM KCl, 2 mM CaCl<sub>2</sub>,  
180 1 mM MgCl<sub>2</sub>, and 10 mM 4-(2-hydroxyethyl)-1-piperazineethanesulfonic acid (HEPES); pH 7.4)  
181 containing 0.02% 3-amino benzoic acid ethylester (MESAB; Western Chemical). We pinned the larvae  
182 with two glass fibers straddling the yolk and a third perpendicular fiber to prevent sliding. For pipettes,  
183 we used borosilicate glass with filament, O.D.: 1.5 mm, O.D.: 0.86 mm, 10 cm length (Sutter, item #  
184 BF150-86-10, fire polished). Using a Sutter Puller (model P-97), we created recording pipettes with a  
185 long shank with a resistance of 10-20 MΩ, after which we beveled the edges to a resistance of 4-5 MΩ  
186 using a Sutter Beveler with impedance meter (model BV-10C). For the glass probe delivering the piezo  
187 stimulus, we pulled a long shank pipette and fire polished to a closed bulb. We shielded the apparatus  
188 with tin foil to completely ground the piezo actuator. To maintain consistent delivery of stimulus, we  
189 always pressed the probe to the front of the head behind the lower eye, level with the otoliths in the ear  
190 of interest. We also maintained a consistent entry point dorsal to the anterior crista and lateral to the  
191 posterior crista. During delivery of stimulus, the piezo probe made light contact with the head. We  
192 drove the piezo with a High Power Amplifier (piezosystem jena, System ENT/ENV, serial # E18605),  
193 and recorded responses in current clamp mode with a patch-clamp amplifier (HEKA, EPC 10 usb  
194 double, serial # 550089). Voltage responses were amplified 1000x and filtered between 0.1 - 3000 Hz  
195 by the Brownlee Precision Instrumentation Amplifier (Model 440). We used a 200 Hz sine wave  
196 stimulus at 10 V and recorded at 20 kHz, collecting 200 traces per experiment. Each stimulus was of  
197 40 ms duration, with 20 ms pre- and post-stimulus periods. The piezo signal was low-pass filtered at  
198 500 Hz using the Low-Pass Bessel Filter 8 Pole (Warner Instruments). In Igor Pro, we averaged each  
199 set of 200 traces to generate one wave response per larva. To quantify hair cell activity, we calculated  
200 the amplitude from base-to-peak of the first peak. Larvae were genotyped as described above.

### 201 **3.10 Hair cell counts**

202 *lhfp15b*<sup>vo35/+</sup> fish were crossed with *Tg(myo6b:eGFP-pA)*<sup>vo68</sup>*Tg; lhfp15b*<sup>vo35/+</sup> fish to produce wild type  
203 and *lhfp15b*<sup>vo35</sup> siblings expressing green fluorescent protein in hair cells. Wild type and *lhfp15b* mutant  
204 larvae were sorted by FM 4-64 labeling (n = 11 each). In experiment 1, larvae (n = 5 each genotype)

205 were fixed in 4% paraformaldehyde at 5 dpf. In experiment 2, larvae (n = 6 each genotype) were imaged  
206 immediately. *lhfp15a<sup>tm290d/+</sup>* fish were in-crossed to produce wild type and *lhfp15a<sup>tm290d</sup>* siblings. Larvae  
207 were sorted based on the auditory and vestibular defects associated with the *lhfp15a<sup>tm290d</sup>* homozygous  
208 mutants. Larvae were labelled with FM 1-43 (n = 6 each). For all experiments, specimens were  
209 mounted in low melting point agarose and the L1, MI1, and O2 neuromasts were imaged on a Zeiss  
210 LSM 800 confocal. Cell counts were performed using the Z-stack data.

### 211 **3.11 Statistics**

212 Statistical analyses were done using the R stats package in RStudio (R Core Team, 2019; RStudio  
213 Team, 2018). P-values of less than 0.05 were considered to be statistically significant. Plots were made  
214 with ggplot2 (Wickham, 2016).

### 215 **3.12 Data availability**

216 The raw data supporting the conclusions of this manuscript will be made available by the  
217 corresponding author, without undue reservation, to any qualified researcher.

## 218 **4 Results**

### 219 **4.1 Teleost fish have ohnologous *lhfp15* genes.**

220 Genes that have been duplicated as a result of a whole genome duplication (WGD) event are known as  
221 *ohnologs* (Ohno, 1970; Wolfe, 2000). Due to the teleost-specific WGD, it is not uncommon to find  
222 ohnologous genes in teleost fish where other vertebrate classes possess a single gene. The *Danio rerio*  
223 (zebrafish) genome contains two *lhfp15* genes: *lhfp15a* (ENSDARG00000045023) and *lhfp15b*  
224 (ENSDARG00000056458). To determine if *lhfp15* duplication is general to the teleost lineage, we  
225 queried either GenBank or Ensembl databases to collect Lhfp15 protein sequences for humans, mice,  
226 chick, frogs, and representative sequences from 14 phylogenetic orders of ray-finned fish  
227 (Actinopterygii), including 13 orders from the Teleostei infraclass and one from the Holostei infraclass  
228 (Supplemental Table 1). The latter (Spotted gar, *Lepisosteus oculatus*) is commonly used to infer the  
229 consequences of the teleost WGD, since the Holostei and Teleostei infraclasses diverged before the  
230 teleost WGD (Braasch et al., 2016). Phylogenetic analysis of the Lhfp15 protein sequences supports  
231 the idea that duplicate *lhfp15* genes originated from the teleost WGD event (Figure 1A). In all 13 teleost  
232 orders surveyed, there are two *lhfp15* genes whose protein products cluster with either the *lhfp15a* or  
233 *lhfp15b* ohnolog groups. Based on available genomic data, there is no evidence that spotted gar fish  
234 have duplicated *lhfp15* genes. Nor is there evidence that the Salmonid-specific WGD (Allendorf and  
235 Thorgaard, 1984) lead to further expansion of the *lhfp15* family. These analyses suggest that the  
236 ancestral *lhfp15* gene was duplicated in the teleost WGD and that the *lhfp15* ohnologs were retained in  
237 all teleost species examined here.

238  
239 Alignment of the zebrafish Lhfp15a and Lhfp15b proteins with those from human, mouse and chicken  
240 reveals that both zebrafish ohnologs retain the same protein structure (Figure 1B). Zebrafish Lhfp15a  
241 and Lhfp15b are 76% identical and 86% similar to one another (Needleman-Wunsch alignment).  
242 Compared to human LHFPL5, Lhfp15a and Lhfp15b are 70 / 65 % identical and 86 / 81 % similar  
243 respectively. The ENU-generated mutation in *lhfp15a* (*tm290d*) (Obholzer et al., 2012) is indicated by  
244 the red triangle (K80X). To investigate the function of *lhfp15b*, we generated a Cas9-induced lesion in  
245 the *lhfp15b* gene in a similar location as the *tm290d* mutation. We recovered a line with a 5 base pair  
246 deletion leading to a frameshift mutation (*lhfp15b<sup>vo35</sup>*, red square; S77FfsX48).  
247

## 248 4.2 *lhfp15a* and *lhfp15b* are expressed in distinct populations of sensory hair cells.

249 To characterize the spatial and temporal patterns of *lhfp15a/b* gene expression, we performed whole  
250 mount mRNA *in situ* hybridization on zebrafish larvae at 1, 2, and 5-days post-fertilization (dpf)  
251 (Figure 2). After one day of development, there are nascent hair cells of the presumptive anterior and  
252 posterior maculae in the developing ear, but no lateral line hair cells at this stage. We detect *lhfp15a*  
253 expression in the presumptive anterior and posterior maculae at 1 dpf (Figure 2A). No signal for *lhfp15b*  
254 was observed at this time point (Figure 2B). At 2 dpf, we observe a clear distinction in the expression  
255 patterns of the *lhfp15a* and *lhfp15b* genes (Figure 2C, D). *lhfp15a* continues to be expressed in the ear,  
256 but expression is not observed in the newly deposited neuromasts. Conversely, we detect *lhfp15b*  
257 expression exclusively in neuromasts at this stage, both on the head (Figure 2D) and trunk (data not  
258 shown). This divergence in *lhfp15* ohnolog expression continues at 5 dpf, with *lhfp15a* found  
259 exclusively in the sensory patches of the ear and *lhfp15b* restricted to lateral line hair cells (Figure 2E-  
260 J). Taken together, our results suggest that both *lhfp15a* and *lhfp15b* have been retained since the teleost  
261 whole genome duplication because of their non-overlapping mRNA expression patterns.

## 262 4.3 *lhfp15a* mediates mechanosensitivity of otic hair cells.

263 *lhfp15a<sup>tm290d</sup>* (*astronaut / asn*) mutants were initially characterized by balance defects, an absence of  
264 the acoustic startle reflex, and a lack of brainstem Ca<sup>2+</sup> signals after acoustic startle. However,  
265 neuromast microphonic potentials were normal (Nicolson et al., 1998). In light of our *in situ*  
266 hybridization data (Figure 2), these results suggest that *lhfp15a* is required for auditory and vestibular  
267 hair cell function only. To test this possibility, we performed several functional assays measuring the  
268 activity of hair cells in the otic capsule. First, we tested macular hair cell activity (Lu and DeSmidt,  
269 2013; Yao et al., 2016) by recording extracellular microphonic potentials from the inner ears of  
270 *lhfp15a<sup>tm290d</sup>* mutants, along with wild type and *lhfp15b<sup>vo35</sup>* larvae at 3 dpf. We then measured baseline-  
271 to-peak amplitude of the first peak to quantify activity (Supplemental Figure 1A-D). Consistent with  
272 the initial characterization of the behavioral defects in *lhfp15a<sup>tm290d</sup>* mutants, we did not detect robust  
273 microphonic potentials from the inner ear of *lhfp15a<sup>tm290d</sup>* mutants (Figure 3A). We measured an  
274 average first peak microphonic of 53.1  $\mu$ V from *lhfp15a<sup>tm290d</sup>* mutants (n = 7), which was significantly  
275 less than the 296.2  $\mu$ V average value of their WT siblings (n = 5; p = 0.01, Welch's t-test). We believe  
276 that at least some of the signal detected in *lhfp15a<sup>tm290d</sup>* mutants may be a stimulus artefact due the  
277 unusual rise time and similar observations we have made in other known transduction-null mutants.

278 For the *lhfp15b<sup>vo35</sup>* mutants (n = 6), we measured an average first peak microphonic potential of 280.9  
279  $\mu$ V. These values were not significantly different from their WT siblings (n = 4, average 243.8  $\mu$ V; p  
280 = 0.7) but were significantly greater than the *lhfp15a<sup>tm290d</sup>* mutants (p = 0.036). Thus, *lhfp15a<sup>tm290d</sup>*  
281 mutants exhibit defects in inner ear function, while the *lhfp15b<sup>vo35</sup>* mutation has no effect on these hair  
282 cells. To further confirm the lack of inner ear function in *lhfp15a<sup>tm290d</sup>* mutants, we performed an  
283 acoustic startle test on larvae at 6 dpf (Figure 3B). Results confirm that *lhfp15a<sup>tm290d</sup>* mutants are  
284 profoundly deaf, displaying little to no response to acoustic stimuli (p < 0.001 compared to all other  
285 genotypes). Finally, we examined the basal MET channel activity of hair cells of the inner ear by  
286 injecting FM 4-64 into the otic capsule and imaging the lateral cristae sensory patch. WT hair cells  
287 readily labeled with FM 4-64 whereas *lhfp15a<sup>tm290d</sup>* mutant cells showed no sign of dye internalization  
288 (Figure 3C-D). These three tests confirmed that all sensory patches in the otic capsule are inactive in  
289 *lhfp15a<sup>tm290d</sup>* mutants.

290 A GFP-*lhfp15a* transgenic line of zebrafish - *Tg(myo6b:eGFP-lhfp15a)vo23Tg* - has been reported  
291 previously (Erickson et al., 2017). GFP-Lhfp15a is present at the tips of stereocilia, similar to the  
292 localization observed for mouse LHFPL5 (Mahendrasingam et al., 2017; Xiong et al., 2012). To

293 demonstrate that the GFP-Lhfp15a protein is functional, we assayed for rescue of the acoustic startle  
294 reflex and MET channel activity in homozygous *lhfp15a<sup>tm290d</sup>* mutants expressing the transgene. The  
295 startle reflex of *lhfp15a<sup>tm290d</sup>* mutants expressing GFP-Lhfp15a were statistically indistinguishable from  
296 non-transgenic and transgenic WT siblings ( $p = 0.48$  and  $0.26$  respectively; Figure 3B). Likewise, FM  
297 4-64 dye-labeling in the inner ear was restored to *lhfp15a<sup>tm290d</sup>* mutants expressing GFP-Lhfp15a (Figure  
298 3E-F'). From these results we conclude that the hair bundle-localized GFP-Lhfp15a protein is  
299 functional and can rescue the behavioral and MET channel defects in *lhfp15a<sup>tm290d</sup>* mutants.

#### 300 **4.4 *lhfp15b* mediates mechanosensitivity of lateral line hair cells.**

301 The divergent expression patterns of the *lhfp15* ohnologs suggests that *lhfp15b* alone may be mediating  
302 mechanosensitivity of lateral line hair cells. To test this, we compared basal MET channel activity in  
303 neuromast hair cells of WT, *lhfp15a<sup>tm290d</sup>* and *lhfp15b<sup>vo35</sup>* larvae using an FM 1-43 dye uptake assay  
304 (Figure 4A-C). Strikingly, lateral line hair cells in *lhfp15b<sup>vo35</sup>* mutants do not label with FM 1-43 while  
305 there is no difference in the intensity of FM 1-43 labeling of hair cells between WT and *lhfp15a<sup>tm290d</sup>*  
306 mutants (Figure 4A-C, Supplemental Figure 2A - C). We quantified this loss of lateral line function in  
307 *lhfp15b* mutants by measuring the average FM 1-43 fluorescence intensity per hair cell in each imaged  
308 neuromast of *lhfp15b<sup>vo35</sup>* mutants and wild type siblings at 2 dpf (Figure 4D, E, H) and 5 dpf (Figure  
309 4F-H). *lhfp15b<sup>vo35</sup>* mutants exhibit a statistically significant decrease in FM 1-43 uptake at both 2 dpf  
310 and 5 dpf (Welch's *t*-test,  $p < 0.001$  both time points). While there is negligible FM dye labeling in the  
311 vast majority of *lhfp15b<sup>vo35</sup>* mutant neuromasts, we occasionally observe labeling in some hair cells,  
312 most reproducibly in the SO3 neuromast. Occasional labeling persists in *lhfp15a / lhfp15b* double  
313 mutants, indicating that *lhfp15a* is not partially compensating for the loss of *lhfp15b* (Supplemental  
314 Figure 3A-D). The loss of MET channel activity in *lhfp15b<sup>vo35</sup>* neuromasts is rescued by expression of  
315 the *GFP-lhfp15a vo23Tg* transgene (Figure 4I, J;  $n = 7/7$  mutant individuals). This result indicates that  
316 Lhfp15a and Lhfp15b are functionally interchangeable in this context.

317 We have previously reported a reduced number of neuromast hair cells in other transduction mutants  
318 such as *myo7aa (mariner)*, *pcdh15a (orbiter)*, and *tomt (mercury)* (Erickson et al., 2017; Seiler et al.,  
319 2005). The ultimate cause for this reduction in hair cell number is not known. If *lhfp15b<sup>vo35</sup>* mutants are  
320 defective in mechanotransduction, we would expect a similar decrease in the number of neuromast hair  
321 cells. To test this idea, we compared hair cell counts between wild type, *lhfp15a<sup>tm290d</sup>*, and *lhfp15b<sup>vo35</sup>*  
322 larvae at 5 dpf. As expected, wild type and *lhfp15a<sup>tm290d</sup>* mutants have statistically equivalent numbers  
323 of hair cells in the neuromasts surveyed (Supplemental Figure 2D,  $p = 0.58$ ). In *lhfp15b<sup>vo35</sup>* mutant  
324 neuromasts, we observe a statistically significant decrease in the number of hair cells (Figure 4K,  
325  $n = 11$  individuals per genotype, 3 NM each,  $p < 0.001$  each NM type by Welch's *t*-test; representative  
326 neuromasts are shown in Supplemental Figure 4). This decrease in the number of neuromast hair cells  
327 is consistent with *lhfp15b* mutants being deficient in mechanotransduction in this cell type.

#### 328 **4.5 *lhfp15* is not required for Tmc localization to the hair bundle in zebrafish hair cells.**

329 Previous studies have demonstrated that loss of LHFPL5 leads to a ~90% reduction in the peak  
330 amplitude of the transduction current in mouse cochlear outer hair cells (Xiong et al., 2012). Single  
331 channel recordings from *Lhfp15* mutants revealed that the remaining transduction current in *Lhfp15*  
332 mutants was mediated by TMC2 (Beurg et al., 2015). Using antibodies to detect endogenous protein,  
333 TMC1 was found to be absent from the bundle of *Lhfp15* mouse mutants. However, injectoprotected  
334 Myc-TMC2 was still able to localize to the hair bundle, supporting the idea that LHFPL5 is required  
335 for the targeting of TMC1, but not TMC2. The localization of exogenously-expressed TMC1 in *Lhfp15*  
336 mutants was not reported.



337 To determine if the Tmcs require Lhfp15a for localization to the hair bundle of zebrafish hair cells, we  
338 bred stable transgenic lines expressing GFP-tagged versions of Tmc1 (*vo27Tg*) and Tmc2b (*vo28Tg*)  
339 (Erickson et al., 2017) into the *lhfp15a<sup>tm290d</sup>* mutant background and imaged Tmc localization in the  
340 lateral cristae of the ear. In contrast to what was observed in mouse cochlear hair cells, both Tmc1-  
341 GFP and Tmc2b-GFP are still targeted to the hair bundle in *lhfp15a<sup>tm290d</sup>* mutants (n = 11/11 and 9/9  
342 individuals respectively; Figure 5A-D'). We also observe Tmc2b-GFP localization in the neuromast  
343 hair bundles of *lhfp15b<sup>vo35</sup>* mutants (n = 7/7 individuals; Figure 5E-F'). Additionally, we do not observe  
344 any rescue of hair cell function in *lhfp15b* mutants expressing the Tmc2b-GFP protein (Supplemental  
345 Figure 5A-C). As such, these results suggest that GFP-tagged Tmc1 and Tmc2b do not require Lhfp15  
346 for hair bundle localization in zebrafish hair cells.

#### 347 **4.6 GFP-Lhfp15a localization in stereocilia requires Pcdh15a, Cdh23, and Myo7aa.**

348 Previous work has shown that PCDH15 and LHFPL5 are mutually dependent on one another to  
349 correctly localize to the site of mechanotransduction in mouse cochlear hair cells (Mahendrasingam et  
350 al., 2017; Xiong et al., 2012). Likewise in zebrafish, Lhfp15a is required for proper Pcdh15a  
351 localization in the hair bundle, as determined Pcdh15a immunostaining and the expression of a  
352 Pcdh15a-GFP transgene in *lhfp15a<sup>tm290d</sup>* mutants (Maeda et al., 2017). Using the previously  
353 characterized antibody against Pcdh15a, we observe the highest level of Pcdh15a staining at the apical  
354 part of the hair bundle, with less intense punctate staining throughout the stereocilia in 3 dpf wild type  
355 larvae (Figure 6A). *lhfp15a<sup>tm290d</sup>* mutants exhibit splayed hair bundles, with low levels of Pcdh15a  
356 staining restricted to the tip of each stereocilium (n = 5/5 individuals; Figure 6B), confirming our  
357 previous report.

358 To determine if Lhfp15a also depends on Pcdh15a for its localization, we imaged GFP-Lhfp15 in the  
359 lateral cristae of *pcdh15a<sup>psi7</sup>* homozygous mutants. In wild type larvae, GFP-Lhfp15a is distributed  
360 throughout the hair bundle at the tips of stereocilia (yellow arrow heads), with a higher intensity of  
361 GFP evident in the tallest rows, possibly at the sites of kinociliary links (Figure 6C, C', arrow). In  
362 *pcdh15a<sup>psi7</sup>* mutants, GFP-Lhfp15a is absent from the hair bundle except for the tallest rows of  
363 stereocilia adjacent to the kinocilium (n = 4 individuals; Figure 6D, D', arrow). We observed similar  
364 results using the *pcdh15a<sup>th263b</sup>* allele (n = 6/6 individuals; Supplemental Figure 6A, B). Consistent with  
365 our earlier studies (Maeda et al., 2017; Seiler et al., 2005), we observe splayed hair bundles in both  
366 *pcdh15a* alleles suggesting a loss of connections and tip links between the stereocilia. These results  
367 indicate that GFP-Lhfp15a requires Pcdh15a for stable targeting to the shorter stereocilia, but Pcdh15a  
368 is not required for retaining GFP-Lhfp15a in the tallest rows of stereocilia adjacent to the kinocilium.

369 The observation that some GFP-Lhfp15a signal remains in the tallest stereocilia of *pcdh15a* mutants  
370 suggests that additional proteins are involved in targeting Lhfp15a to these sites in zebrafish vestibular  
371 hair cells. Previous research has shown that mouse CDH23 still localizes to tips of stereocilia in  
372 PCDH15-deficient mice (Boëda et al., 2002; Senften et al., 2006) and that CDH23 is a component of  
373 kinociliary links (Goodyear et al., 2010; Siemens et al., 2004). Based on these reports, we tested  
374 whether Cdh23 was required for GFP-Lhfp15a localization. In *cdh23<sup>ml9</sup>* mutants, GFP-Lhfp15 is  
375 sparsely distributed throughout the length of the kinocilium (n = 4/4 individuals, Figure 6E, E'). We  
376 also observe a redistribution of GFP-Lhfp15a into the kinocilium using the *cdh23<sup>tj264</sup>* allele (n = 4/4  
377 individuals; Supplemental Figure 6C). In both *cdh23* alleles, we see occasional GFP signal in the  
378 stereocilia as well, though this localization is not as robust. Interestingly, these results contrast with  
379 those from mouse cochlear hair cells which showed that Lhfp15 does not require Cdh23 for bundle  
380 localization (Zhao et al., 2014). The same study also could not detect any biochemical interaction  
381 between LHFPL5 and proteins of the upper tip link density including CDH23, USH1C / Harmonin, or

382 USH1G / Sans. Together, our data indicate an unexpected role for Cdh23 in the localization of GFP-  
383 Lhfp15a to the region of kinocilial links in zebrafish vestibular hair cells.

384 Myosin 7A (MYO7A) is an actin-based motor protein required for the localization of many proteins  
385 of the hair bundle, including PCDH15 and USH1C / Harmonin, along with several proteins of the  
386 Usher type 2 complex (Boëda et al., 2002; Lefevre et al., 2008; Maeda et al., 2017; Morgan et al., 2016;  
387 Senften et al., 2006; Zou et al., 2017). Results in both mice and zebrafish suggest that MYO7A is not  
388 required for CDH23 bundle localization (Blanco-Sanchez et al., 2014; Senften et al., 2006). However,  
389 its role in Lhfp15 localization has not been examined. In *myo7aa<sup>ty220</sup>* (*mariner*) mutant hair cells, GFP-  
390 Lhfp15a localization in hair bundle is severely disrupted (n = 5/5 individuals; Figure 6 F, F'). We  
391 observe GFP signal near the base of hair bundles and occasionally in stereocilia (yellow arrowheads),  
392 but do not see robust Lhfp15a localization in the presumptive kinocilial links nor to the kinocilium  
393 itself. Taken together, our results using the GFP-Lhfp15a transgene suggest that Pcdh15a, Cdh23, and  
394 Myo7aa all play distinct roles in Lhfp15 localization in the bundle of zebrafish vestibular hair cells.

## 395 **5 Discussion**

396 In this study, we provide support for the following points: 1) The ancestral *lhfp15* gene was likely  
397 duplicated as a result of the teleost whole genome duplication, leading to the *lhfp15a* and *lhfp15b*  
398 ohnologs described in this paper. 2) In zebrafish, there has been subfunctionalization of these genes as  
399 a result of their divergent expression patterns. As determined by mRNA *in situ* hybridization, *lhfp15a*  
400 is expressed only in auditory and vestibular hair cells of the ear while *lhfp15b* is expressed solely in  
401 hair cells of the lateral line organ. Consistent with their expression patterns, we show that each ohnolog  
402 mediates mechanotransduction in the corresponding populations of sensory hair cells in zebrafish. 3)  
403 Targeting of GFP-tagged Tmcs to the hair bundle is independent of Lhfp15a function. 4) Proper  
404 targeting of GFP-tagged Lhfp15a to the hair bundle requires the tip link protein Pcdh15a, but as in mice,  
405 Lhfp15a can localize to regions of the hair bundle independently of Pcdh15 function. Additionally, we  
406 demonstrate novel requirements for Cdh23 and the Myo7aa motor protein in Lhfp15 localization.

### 407 **5.1 Duplicated zebrafish genes in hair cell function.**

408 With regards to genes involved in hair cell function, the zebrafish duplicates of *calcium channel*,  
409 *voltage-dependent, L type, alpha 1D* (*cacna1d / cav1.3*), *C-terminal binding protein 2* (*ctbp2 / ribeye*),  
410 *myosin 6* (*myo6*), *otoferlin* (*otof*), *pcdh15*, and *tmc2* have been analyzed genetically. In the cases of  
411 *cacna1db*, *pcdh15b* and *myo6a*, these ohnologs are no longer functional in hair cells (Seiler et al., 2004,  
412 2005; Sidi et al., 2004). For the *ctbp2*, *otoferlin*, and *tmc2* duplicates, both genes are required in at least  
413 partially overlapping populations of hair cells (Chou et al., 2017; Lv et al., 2016; Maeda et al., 2014;  
414 Sheets et al., 2011). In contrast, our results for the *lhfp15* ohnologs suggest that each gene is expressed  
415 and functionally required in distinct, non-overlapping hair cell lineages. To our knowledge, this is the  
416 first description of duplicated genes whose expression patterns have cleanly partitioned between inner  
417 ear and lateral line hair cells.

### 418 **5.2 Subfunctionalization of zebrafish *lhfp15* ohnologs.**

419 We constructed a phylogenetic tree using publicly available Lhfp15 protein sequence data (Figure 1)  
420 Our results suggest that the ancestral *lhfp15* gene was duplicated during the teleost WGD event and that  
421 both genes have been retained throughout the teleost lineage (Figure 1). Our conclusion that *lhfp15a*  
422 and *lhfp15b* are ohnologs is substantiated by a recent study of ohnologs in teleosts (Singh and Isambert,  
423 2019). In all four teleost species surveyed, Singh and Isambert show that *lhfp15a* and *lhfp15b* are true  
424 ohnologs that arose from the teleost-specific WGD under the strictest criteria used in their study.

425 Some kind of selection pressure is required for the retention of both gene ohnologs (Glasauer and  
426 Neuhauss, 2014). Our in situ hybridization results show that *lhfp15a* and *lhfp15b* are expressed in  
427 distinct populations of hair cells and support the idea that the zebrafish *lhfp15* ohnologs were retained  
428 because of their divergent expression patterns (Figure 2). Analysis of hair cell function in the different  
429 *lhfp15* mutants agrees with the gene expression results, showing that *lhfp15a* is required for transduction  
430 in the ear while *lhfp15b* plays the same role in the lateral line organs. However, rescue of the MET  
431 channel defects in *lhfp15b*<sup>vo35</sup> mutants by GFP-tagged Lhfp15a suggests that the functions of these  
432 ohnologs are at least partially interchangeable. This result is not surprising given the high degree of  
433 similarity between the Lhfp15a and 5b proteins. As such, the subfunctionalization of the *lhfp15* ohnologs  
434 appears to be caused by the divergence in their expression patterns rather than functional differences  
435 in their protein products. It is possible that a similar mechanism is responsible for the retention of both  
436 genes in other teleost species as well, though the expression patterns of the *lhfp15* ohnologs have not  
437 been examined in other fish.

438 The non-overlapping expression of the *lhfp15* ohnologs provides us with a unique genetic tool to study  
439 lateral line function. Most mechanotransduction mutants in zebrafish disrupt both inner ear and lateral  
440 line hair cell function (Nicolson, 2017). As such, we are unable to assess the role of the lateral line  
441 independently of auditory and vestibular defects, which are lethal for larval fish. The *lhfp15b* mutants  
442 are adult viable (data not shown) and represent a possible genetic model for understanding the lateral  
443 line in both larval and adult fish. Future studies on adults will determine whether the lateral line remains  
444 non-functional and whether *lhfp15b* contributes to inner ear function in the mature auditory and  
445 vestibular systems.

### 446 **5.3 The molecular requirements for bundle localization of MET complex proteins differs** 447 **between mouse and zebrafish hair cells.**

448 Our understanding of mechanotransduction at the molecular level is heavily informed by work done  
449 using mouse cochlear hair cells. However, analysis of zebrafish inner ear and lateral line hair cells can  
450 lead to a more complete picture of how vertebrate sensory hair cells form the MET complex. At their  
451 core, the genetic and molecular bases for mechanotransduction are well conserved between mouse and  
452 zebrafish hair cells. For example, the tip link proteins Cdh23 and Pcdh15a, MET channel subunits  
453 Tmc1/2, Tmie, and Lhfp15, along with additional factors such as Tomt, Cib2, and Myo7aa are all  
454 necessary for MET channel function in both mice and fish (Cunningham et al., 2017; Erickson et al.,  
455 2017; Giese et al., 2017; Gleason et al., 2009; Kawashima et al., 2011; Nicolson et al., 1998; Pacentine  
456 and Nicolson, 2019; Senften et al., 2006; Siemens et al., 2004; Söllner et al., 2004; Xiong et al., 2012;  
457 Zhao et al., 2014). However, while each of these factors are required for mechanotransduction in  
458 vertebrate hair cells, the details of how they contribute to MET channel function may differ depending  
459 on the particular type of hair cell or the vertebrate species. For example, Tmie is required for Tmc  
460 localization to the hair bundle in zebrafish (Pacentine and Nicolson, 2019), but this does not appear to  
461 be the case in mouse cochlear hair cells (Zhao et al., 2014). The evolutionary pressures that lead to  
462 these differences between mouse and zebrafish hair cells are not understood.

463 Based on multiple lines of evidence gathered from mice, TMC1 and TMC2 have different requirements  
464 for LHFPL5 regarding localization to the hair bundle (Beurg et al., 2015). Endogenous TMC1 is absent  
465 from the bundle in LHFPL5-deficient cochlear hair cells with the remaining MET current mediated  
466 through TMC2. Exogenously-expressed TMC2 is still targeted correctly in *Lhfp15* mutants, but it was  
467 not reported whether the same is true for exogenous TMC1, nor whether similar requirements hold for  
468 vestibular hair cells. As such, the role of LHFPL5 in mechanotransduction is not clear: is LHFPL5

469 required primarily for targeting TMC1 to the hair bundle, or does LHFPL5 mediate MET channel  
470 function in other ways?

471 For our study, we used stable transgenic lines expressing GFP-tagged *Tmc1* and *Tmc2b* to show that  
472 the *Tmcs* do not require *Lhfp15a* for targeting to the stereocilia of zebrafish vestibular hair cells. Nor  
473 is *Lhfp15b* required for *Tmc2b*-GFP localization in the hair bundle of neuromast hair cells. The  
474 occasional FM labeled-hair cell in *lhfp15b* and *lhfp15a/5b* mutant neuromasts is consistent with the  
475 continued ability of the *Tmcs* to localize to the hair bundle. This observation is reminiscent of the  
476 sporadic, low level of FM dye labeling in the cochlear hair cells of *Lhfp15* mutant mice (György et al.,  
477 2017). Partial compensation by yet another member of the *lhfp1* family remains as a possible  
478 explanation for the remaining basal channel function. Lastly, we find that exogenous *Tmc* expression  
479 does not rescue MET channel activity in either *lhfp15* mutant zebrafish. Taken together, our results  
480 support a *Tmc*-independent role for *Lhfp15* proteins in mechanotransduction.

481 What then is the role of LHFPL5 in vertebrate mechanotransduction? LHFPL5 and PCDH15 are known  
482 to form a protein complex and regulate each other's localization to the site of mechanotransduction in  
483 mouse cochlear hair cells (Ge et al., 2018; Mahendrasingam et al., 2017; Xiong et al., 2012). However,  
484 their localization to the hair bundle is not completely dependent on one another. For example, tips links  
485 are not completely lost in *Lhfp15*<sup>-/-</sup> cochlear hair cells and exogenous overexpression of PCDH15  
486 partially rescues the transduction defects in *Lhfp15* mutant mice (Xiong et al., 2012). Similarly, a  
487 detailed immunogold study in wild type and *Pcdh15*<sup>-/-</sup> cochlear hair cells showed that there are  
488 PCDH15-dependent and PCDH15-independent sites of LHFPL5 localization (Mahendrasingam et al.,  
489 2017). PCDH15 is required for stable LHFPL5 localization at the tips of ranked stereocilia in  
490 association with the MET channel complex. However, LHFPL5 is still targeted to shaft and ankle links,  
491 unranked stereocilia, and the kinocilium in P0-P3 inner and outer hair cells from both wild type and  
492 *Pcdh15*<sup>-/-</sup> mutant mice (Mahendrasingam et al., 2017). Whether the kinocilial localization would  
493 remain in mature cochlear hair cells is not known because the kinocilia degenerate by P8 in mice and  
494 detailed LHFPL5 localization in vestibular hair cells (which retain their kinocilium) has not been  
495 reported.

496 Zebrafish hair cells retain a kinocilium throughout their life, thus providing a different context in which  
497 to examine *Lhfp15* localization. In wild type hair cells, GFP-*Lhfp15a* is present at the tips of the shorter  
498 ranked stereocilia, but the most robust signal is detected in the tallest stereocilia adjacent to the  
499 kinocilium. In *pcdh15a* mutants, only this "kinocilial link"-like signal remains in the hair bundle. This  
500 result is similar to the LHFPL5 localization reported at the tips of the tallest stereocilia of P3 cochlear  
501 hair cells from wild type mice, a region where LHFPL5 would presumably not be associated with either  
502 PCDH15 or the TMCs (Mahendrasingam et al., 2017). Since the kinocilium does not degenerate in  
503 zebrafish hair cells, our results suggest that *Lhfp15a* is normally targeted to these kinocilial links in  
504 wild type cells and that its retention at this site does not require *Pcdh15a*. Thus, there are PCDH15-  
505 dependent and PCDH15-independent mechanisms of LHFPL5 localization in both mouse and  
506 zebrafish hair cells. These results suggest that LHFPL5 performs as-of-yet uncharacterized PCDH15-  
507 independent functions as well.

508 *Cdh23* is thought to form part of the linkages between the kinocilium and adjacent stereocilia, and  
509 therefore may play a role in retaining *Lhfp15a* at these sites. Consistent with this hypothesis, *cdh23*  
510 mutants do not exhibit GFP-*Lhfp15a* accumulation in stereocilia. Instead, GFP-*Lhfp15a* is diffusely  
511 distributed throughout the kinocilium. These data suggest that normal *Lhfp15a* localization requires  
512 both *Pcdh15a* and *Cdh23* function, albeit in distinct ways. This result differs from previous reports  
513 which found that *Lhfp15* still localized to the tips of stereocilia in *CDH23*-deficient cochlear hair cells

514 of mice. The same study also could not detect a biochemical interaction between Lhfp15 and CDH23  
515 via co-IP in heterologous cells (Xiong et al., 2012). Given these contrasting results for mouse and  
516 zebrafish hair cells, it seems that the requirement for Cdh23 in the localization of LHFPL5 is not a  
517 universal one.

518 Given the available biochemical evidence, it is possible that the association between Lhfp15a and  
519 Cdh23 is indirect through an as-of-yet unidentified protein or protein complex. Based on the defects in  
520 GFP-Lhfp15a localization in *myo7aa* mutants, Myo7aa is a candidate member of this uncharacterized  
521 protein complex. Taken together, these results highlight the fact that, although all sensory hair cells  
522 share many core genetic and biochemical features, there are important details that differ between the  
523 various types of hair cells and between vertebrate species. Analyzing these differences will allow for  
524 a more comprehensive understanding of vertebrate hair cell function and the underlying principles of  
525 mechanotransduction.

## 526 **6 Conflict of Interest**

527 The authors declare that the research was conducted in the absence of any commercial or financial  
528 relationships that could be construed as a potential conflict of interest.

## 529 **7 Author Contributions**

530 TE and TN conceived and designed the study; TE, IVP, AV, and RC collected and analyzed the data,  
531 TE wrote the manuscript with Methods sections contributed by IVP and AV and editorial input from  
532 TN and IVP.

## 533 **8 Funding**

534 This study was supported by funding from the NIDCD (R01 DC013572 and DC013531 to T.N.) and  
535 from East Carolina University's Division of Research, Economic Development and Engagement  
536 (REDE), Thomas Harriot College of Arts and Science (THCAS), and Department of Biology (to T.E.)

## 537 **9 Acknowledgments**

538 We thank Eliot Smith for assistance with CRISPR-Cas9 knockout of *lhfp15b*. We also thank Leah  
539 Snyder, Matthew Esqueda, and members of the Erickson lab for their assistance with animal  
540 husbandry.

## 541 **10 References**

- 542 Allendorf, F. W., and Thorgaard, G. H. (1984). "Tetraploidy and the Evolution of Salmonid Fishes,"  
543 in *Evolutionary Genetics of Fishes* (Boston, MA: Springer US), 1–53. doi:10.1007/978-1-4684-  
544 4652-4\_1.
- 545 Beurg, M., Xiong, W., Zhao, B., Müller, U., and Fettilplace, R. (2015). Subunit determination of the  
546 conductance of hair-cell mechanotransducer channels. *Proc. Natl. Acad. Sci.* 112, 1589–1594.  
547 doi:10.1073/pnas.1420906112.
- 548 Blanco-Sanchez, B., Clement, A., Fierro, J., Washbourne, P., and Westerfield, M. (2014). Complexes  
549 of Usher proteins preassemble at the endoplasmic reticulum and are required for trafficking and  
550 ER homeostasis. *Dis. Model. Mech.* 7, 547–559. doi:10.1242/dmm.014068.

- 551 Boëda, B., El-Amraoui, A., Bahloul, A., Goodyear, R., Daviet, L., Blanchard, S., et al. (2002).  
552 Myosin VIIa, harmonin and cadherin 23, three Usher I gene products that cooperate to shape the  
553 sensory hair cell bundle. *EMBO J.* 21, 6689–99. doi:10.1093/emboj/cdf689.
- 554 Braasch, I., Gehrke, A. R., Smith, J. J., Kawasaki, K., Manousaki, T., Pasquier, J., et al. (2016). The  
555 spotted gar genome illuminates vertebrate evolution and facilitates human-teleost comparisons.  
556 *Nat. Genet.* 48, 427–437. doi:10.1038/ng.3526.
- 557 Chou, S.-W., Chen, Z., Zhu, S., Davis, R. W., Hu, J., Liu, L., et al. (2017). A molecular basis for  
558 water motion detection by the mechanosensory lateral line of zebrafish. *Nat. Commun.* 8, 2234.  
559 doi:10.1038/s41467-017-01604-2.
- 560 Cunningham, C. L., and Müller, U. (2019). Molecular Structure of the Hair Cell Mechanoelectrical  
561 Transduction Complex. *Cold Spring Harb. Perspect. Med.* 9, a033167.  
562 doi:10.1101/cshperspect.a033167.
- 563 Cunningham, C. L., Wu, Z., Jafari, A., Zhao, B., Schrode, K., Harkins-Perry, S., et al. (2017). The  
564 murine catecholamine methyltransferase mTOMT is essential for mechanotransduction by  
565 cochlear hair cells. *Elife* 6. doi:10.7554/eLife.24318.
- 566 Dereeper, A., Guignon, V., Blanc, G., Audic, S., Buffet, S., Chevenet, F., et al. (2008). Phylogeny.fr:  
567 robust phylogenetic analysis for the non-specialist. *Nucleic Acids Res.* 36, W465–W469.  
568 doi:10.1093/nar/gkn180.
- 569 Erickson, T., French, C. R., and Waskiewicz, A. J. (2010). Meis1 specifies positional information in  
570 the retina and tectum to organize the zebrafish visual system. *Neural Dev.* 5, 22.  
571 doi:10.1186/1749-8104-5-22.
- 572 Erickson, T., Morgan, C. P., Olt, J., Hardy, K., Busch-Nentwich, E., Maeda, R., et al. (2017).  
573 Integration of Tmc1/2 into the mechanotransduction complex in zebrafish hair cells is regulated  
574 by Transmembrane O-methyltransferase (Tomt). *Elife* 6. doi:10.7554/eLife.28474.
- 575 Ernest, S., Rauch, G.-J., Haffter, P., Geisler, R., Petit, C., and Nicolson, T. (2000). Mariner is  
576 defective in myosin VIIA: a zebrafish model for human hereditary deafness. *Hum. Mol. Genet.*  
577 9, 2189–2196. doi:10.1093/hmg/9.14.2189.
- 578 Gagnon, J. A., Valen, E., Thyme, S. B., Huang, P., Ahkmetova, L., Pauli, A., et al. (2014). Efficient  
579 Mutagenesis by Cas9 Protein-Mediated Oligonucleotide Insertion and Large-Scale Assessment  
580 of Single-Guide RNAs. *PLoS One* 9, e98186. doi:10.1371/journal.pone.0098186.
- 581 Ge, J., Elferich, J., Goehring, A., Zhao, H., Schuck, P., and Gouaux, E. (2018). Structure of mouse  
582 protocadherin 15 of the stereocilia tip link in complex with LHFPL5. *Elife* 7.  
583 doi:10.7554/eLife.38770.
- 584 Giese, A. P. J., Tang, Y.-Q., Sinha, G. P., Bowl, M. R., Goldring, A. C., Parker, A., et al. (2017).  
585 CIB2 interacts with TMC1 and TMC2 and is essential for mechanotransduction in auditory hair  
586 cells. *Nat. Commun.* 8, 43. doi:10.1038/s41467-017-00061-1.
- 587 Glasauer, S. M. K., and Neuhauss, S. C. F. (2014). Whole-genome duplication in teleost fishes and  
588 its evolutionary consequences. *Mol. Genet. Genomics* 289, 1045–1060. doi:10.1007/s00438-

- 589 014-0889-2.
- 590 Gleason, M. R., Nagiel, A., Jamet, S., Vologodskaja, M., López-Schier, H., and Hudspeth, A. J.  
591 (2009). The transmembrane inner ear (Tmie) protein is essential for normal hearing and balance  
592 in the zebrafish. *Proc. Natl. Acad. Sci. U. S. A.* 106, 21347–52. doi:10.1073/pnas.0911632106.
- 593 Goodyear, R. J., Forge, A., Legan, P. K., and Richardson, G. P. (2010). Asymmetric distribution of  
594 cadherin 23 and protocadherin 15 in the kinocilial links of avian sensory hair cells. *J. Comp.*  
595 *Neurol.* 518, 4288–4297. doi:10.1002/cne.22456.
- 596 György, B., Sage, C., Indzhykulian, A. A., Scheffer, D. I., Brisson, A. R., Tan, S., et al. (2017).  
597 Rescue of Hearing by Gene Delivery to Inner-Ear Hair Cells Using Exosome-Associated AAV.  
598 *Mol. Ther.* 25, 379–391. doi:10.1016/j.ymthe.2016.12.010.
- 599 Kawashima, Y., Géléoc, G. S. G., Kurima, K., Labay, V., Lelli, A., Asai, Y., et al. (2011).  
600 Mechanotransduction in mouse inner ear hair cells requires transmembrane channel-like genes.  
601 *J. Clin. Invest.* 121, 4796–809. doi:10.1172/JCI60405.
- 602 Kazmierczak, P., Sakaguchi, H., Tokita, J., Wilson-Kubalek, E. M., Milligan, R. A., Müller, U., et al.  
603 (2007). Cadherin 23 and protocadherin 15 interact to form tip-link filaments in sensory hair  
604 cells. *Nature* 449, 87–91. doi:10.1038/nature06091.
- 605 Lefevre, G., Michel, V., Weil, D., Lepelletier, L., Bizard, E., Wolfrum, U., et al. (2008). A core  
606 cochlear phenotype in USH1 mouse mutants implicates fibrous links of the hair bundle in its  
607 cohesion, orientation and differential growth. *Development* 135, 1427–1437.  
608 doi:10.1242/dev.012922.
- 609 Li, X., Yu, X., Chen, X., Liu, Z., Wang, G., Li, C., et al. (2019). Localization of TMC1 and LHFPL5  
610 in auditory hair cells in neonatal and adult mice. *FASEB J.* 33, 6838–6851.  
611 doi:10.1096/fj.201802155RR.
- 612 Longo-Guess, C. M., Gagnon, L. H., Cook, S. A., Wu, J., Zheng, Q. Y., and Johnson, K. R. (2005). A  
613 missense mutation in the previously undescribed gene *Tmhs* underlies deafness in hurry-scurry  
614 (*hscy*) mice. *Proc. Natl. Acad. Sci.* 102, 7894–7899. doi:10.1073/pnas.0500760102.
- 615 Lu, Z., and DeSmidt, A. A. (2013). Early Development of Hearing in Zebrafish. *JARO J. Assoc. Res.*  
616 *Otolaryngol.* 14, 509. doi:10.1007/S10162-013-0386-Z.
- 617 Lv, C., Stewart, W. J., Akanyeti, O., Frederick, C., Zhu, J., Santos-Sacchi, J., et al. (2016). Synaptic  
618 Ribbons Require Ribeye for Electron Density, Proper Synaptic Localization, and Recruitment of  
619 Calcium Channels. *Cell Rep.* 15, 2784–2795. doi:10.1016/j.celrep.2016.05.045.
- 620 Maeda, R., Kindt, K. S., Mo, W., Morgan, C. P., Erickson, T., Zhao, H., et al. (2014). Tip-link  
621 protein protocadherin 15 interacts with transmembrane channel-like proteins TMC1 and TMC2.  
622 *Proc. Natl. Acad. Sci. U. S. A.* 111, 12907–12. doi:10.1073/pnas.1402152111.
- 623 Maeda, R., Pacentine, I. V., Erickson, T., and Nicolson, T. (2017). Functional Analysis of the  
624 Transmembrane and Cytoplasmic Domains of *Pcdh15a* in Zebrafish Hair Cells. *J. Neurosci.* 37,  
625 3231–3245. doi:10.1523/JNEUROSCI.2216-16.2017.

- 626 Mahendrasingam, S., Fettiplace, R., Alagramam, K. N., Cross, E., and Furness, D. N. (2017).  
627 Spatiotemporal changes in the distribution of LHFPL5 in mice cochlear hair bundles during  
628 development and in the absence of PCDH15. *PLoS One* 12, e0185285.  
629 doi:10.1371/journal.pone.0185285.
- 630 Morgan, C. P., Krey, J. F., Grati, M., Zhao, B., Fallen, S., Kannan-Sundhari, A., et al. (2016).  
631 PDZD7-MYO7A complex identified in enriched stereocilia membranes. *Elife* 5.  
632 doi:10.7554/eLife.18312.
- 633 Nicolson, T. (2017). The genetics of hair-cell function in zebrafish. *J. Neurogenet.* 31, 102–112.  
634 doi:10.1080/01677063.2017.1342246.
- 635 Nicolson, T., Rüsçh, A., Friedrich, R. W., Granato, M., Ruppertsberg, J. P., and Nüsslein-Volhard, C.  
636 (1998). Genetic analysis of vertebrate sensory hair cell mechanosensation: the zebrafish circler  
637 mutants. *Neuron* 20, 271–83. doi:10.1016/S0896-6273(00)80455-9.
- 638 Obholzer, N., Swinburne, I. A., Schwab, E., Nechiporuk, A. V, Nicolson, T., and Megason, S. G.  
639 (2012). Rapid positional cloning of zebrafish mutations by linkage and homozygosity mapping  
640 using whole-genome sequencing. *Development* 139, 4280–4290. doi:10.1242/dev.083931.
- 641 Ohno, S. (1970). *Evolution by Gene Duplication*. Berlin, Heidelberg: Springer Berlin Heidelberg  
642 doi:10.1007/978-3-642-86659-3.
- 643 Pacentine, I. V., and Nicolson, T. (2019). Subunits of the mechano-electrical transduction channel,  
644 *Tmc1/2b*, require *Tmie* to localize in zebrafish sensory hair cells. *PLOS Genet.* 15, e1007635.  
645 doi:10.1371/journal.pgen.1007635.
- 646 Pan, B., Akyuz, N., Liu, X.-P., Asai, Y., Nist-Lund, C., Kurima, K., et al. (2018). TMC1 Forms the  
647 Pore of Mechanosensory Transduction Channels in Vertebrate Inner Ear Hair Cells. *Neuron* 99,  
648 736-753.e6. doi:10.1016/j.neuron.2018.07.033.
- 649 Pan, B., Géléoc, G. S., Asai, Y., Horwitz, G. C., Kurima, K., Ishikawa, K., et al. (2013). TMC1 and  
650 TMC2 Are Components of the Mechanotransduction Channel in Hair Cells of the Mammalian  
651 Inner Ear. *Neuron* 79, 504–515. doi:10.1016/j.neuron.2013.06.019.
- 652 R Core Team (2019). R: A Language and Environment for Statistical Computing. Available at:  
653 <https://www.r-project.org/>.
- 654 RStudio Team (2018). RStudio: Integrated Development Environment for R. Available at:  
655 <http://www.rstudio.com/>.
- 656 Schneider, C. A., Rasband, W. S., and Eliceiri, K. W. (2012). NIH Image to ImageJ: 25 years of  
657 image analysis. *Nat. Methods* 9, 671–5. Available at:  
658 <http://www.ncbi.nlm.nih.gov/pubmed/22930834> [Accessed January 13, 2019].
- 659 Seiler, C., Ben-David, O., Sidi, S., Hendrich, O., Rusch, A., Burnside, B., et al. (2004). Myosin VI is  
660 required for structural integrity of the apical surface of sensory hair cells in zebrafish. *Dev. Biol.*  
661 272, 328–38. doi:10.1016/j.ydbio.2004.05.004.
- 662 Seiler, C., Finger-Baier, K. C., Rinner, O., Makhankov, Y. V, Schwarz, H., Neuhauss, S. C. F., et al.



- 663 (2005). Duplicated genes with split functions: independent roles of protocadherin15 orthologues  
664 in zebrafish hearing and vision. *Development* 132, 615–23. doi:10.1242/dev.01591.
- 665 Senften, M., Schwander, M., and Kazmierczak, P. (2006). Physical and functional interaction  
666 between protocadherin 15 and myosin VIIa in mechanosensory hair cells. *J. Neurosci.* 26, 2060–2071.  
667 doi:10.1523/JNEUROSCI.4251-05.2006.
- 668 Shabbir, M. I., Ahmed, Z. M., Khan, S. Y., Riazuddin, S., Waryah, A. M., Khan, S. N., et al. (2006).  
669 Mutations of human TMHS cause recessively inherited non-syndromic hearing loss. *J. Med.*  
670 *Genet.* 43, 634–40. doi:10.1136/jmg.2005.039834.
- 671 Sheets, L., Trapani, J. G., Mo, W., Obholzer, N., and Nicolson, T. (2011). Ribeye is required for  
672 presynaptic CaV1.3a channel localization and afferent innervation of sensory hair cells.  
673 *Development* 138, 1309–1319. doi:10.1242/dev.059451.
- 674 Sidi, S., Busch-Nentwich, E., Friedrich, R., Schoenberger, U., and Nicolson, T. (2004). *gemin1*  
675 encodes a zebrafish L-type calcium channel that localizes at sensory hair cell ribbon synapses. *J.*  
676 *Neurosci.* 24, 4213–4223. doi:10.1523/JNEUROSCI.0223-04.2004.
- 677 Siemens, J., Lillo, C., Dumont, R. A., Reynolds, A., Williams, D. S., Gillespie, P. G., et al. (2004).  
678 Cadherin 23 is a component of the tip link in hair-cell stereocilia. *Nature* 428, 950–955.  
679 doi:10.1038/nature02483.
- 680 Singh, P. P., and Isambert, H. (2019). OHNOLOGS v2: a comprehensive resource for the genes  
681 retained from whole genome duplication in vertebrates. *Nucleic Acids Res.*  
682 doi:10.1093/nar/gkz909.
- 683 Söllner, C., Rauch, G.-J., Siemens, J., Geisler, R., Schuster, S. C., Müller, U., et al. (2004). Mutations  
684 in cadherin 23 affect tip links in zebrafish sensory hair cells. *Nature* 428, 955–959.  
685 doi:10.1038/nature02484.
- 686 Thisse, C., and Thisse, B. (2008). High-resolution in situ hybridization to whole-mount zebrafish  
687 embryos. *Nat. Protoc.* 3, 59–69. doi:10.1038/nprot.2007.514.
- 688 Westerfield, M. (2000). *The zebrafish book. A guide for the laboratory use of zebrafish (Danio*  
689 *rerio)*. 4th ed. Eugene OR: University of Oregon Available at:  
690 [http://zfin.org/zf\\_info/zfbook/zfbk.html](http://zfin.org/zf_info/zfbook/zfbk.html).
- 691 Wickham, H. (2016). *ggplot2: Elegant Graphics for Data Analysis*. Springer-Verlag New York  
692 Available at: <https://ggplot2.tidyverse.org>.
- 693 Wolfe, K. (2000). Robustness—it’s not where you think it is. *Nat. Genet.* 25, 3–4.  
694 doi:10.1038/75560.
- 695 Xiong, W., Grillet, N., Elledge, H. M., Wagner, T. F. J., Zhao, B., Johnson, K. R., et al. (2012).  
696 TMHS is an integral component of the mechanotransduction machinery of cochlear hair cells.  
697 *Cell* 151, 1283–95. doi:10.1016/j.cell.2012.10.041.
- 698 Yao, Q., DeSmidt, A. A., Tekin, M., Liu, X., and Lu, Z. (2016). Hearing Assessment in Zebrafish  
699 During the First Week Postfertilization. *Zebrafish* 13, 79. doi:10.1089/ZEB.2015.1166.

- 700 Zhao, B., Wu, Z., Grillet, N., Yan, L., Xiong, W., Harkins-Perry, S., et al. (2014). TMIE Is an  
701 Essential Component of the Mechanotransduction Machinery of Cochlear Hair Cells. *Neuron*  
702 84, 954–967. doi:10.1016/j.neuron.2014.10.041.
- 703 Zou, J., Chen, Q., Almishaal, A., Mathur, P. D., Zheng, T., Tian, C., et al. (2017). The roles of USH1  
704 proteins and PDZ domain-containing USH proteins in USH2 complex integrity in cochlear hair  
705 cells. *Hum. Mol. Genet.* 26, 624–636. doi:10.1093/hmg/ddw421.
- 706

707 **11 Figures**

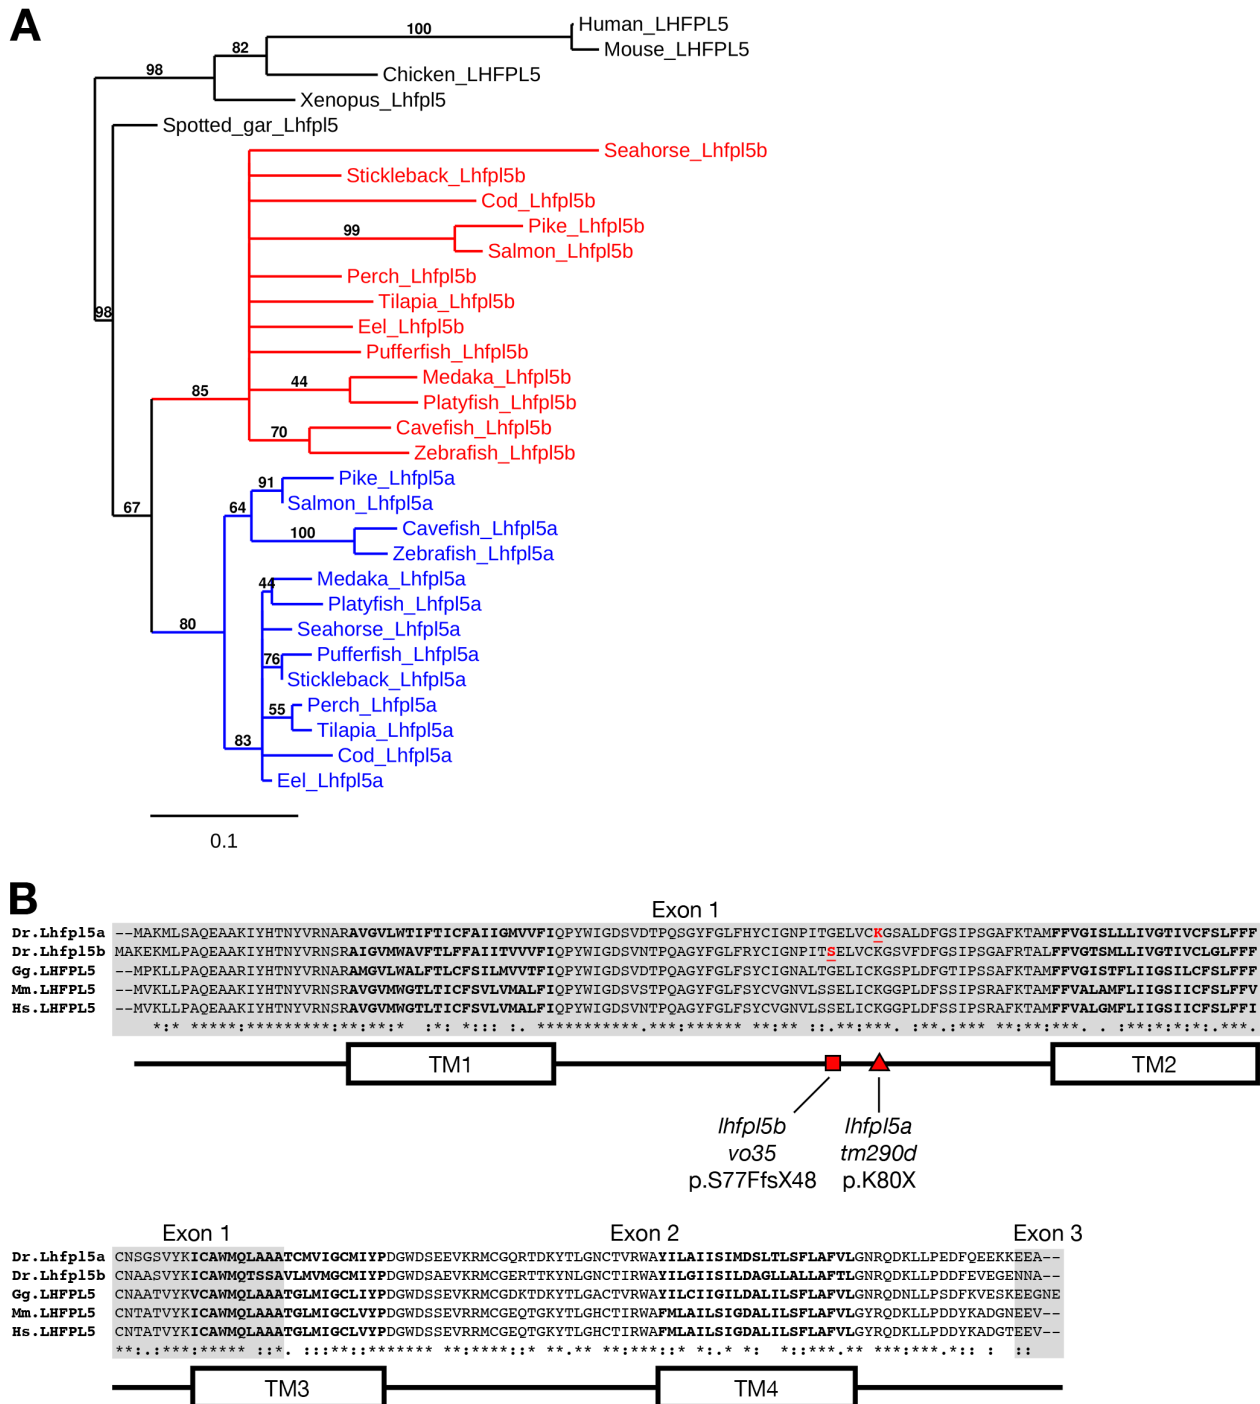

708  
 709 **Figure 1.** Duplicated *lhfp15* genes in teleost fish. **(A)** Phylogenetic tree of representative teleost and  
 710 vertebrate Lhfp15 protein sequences. See Supplemental Table 1 for species' names and protein  
 711 accession numbers. **(B)** Sequence alignment of Lhfp15 proteins from zebrafish (*Danio rerio*, Dr),  
 712 chicken (*Gallus gallus*, Gg), mouse (*Mus musculus*, Mm), and humans (*Homo sapiens*, Hs). Regions  
 713 of the proteins coded for by exons 1 and 3 are shaded grey. Locations of the transmembrane (TM)  
 714 helices 1-4 are shown in the linear protein structure diagram. The *lhfp15a*<sup>tm290d</sup> and *lhfp15b*<sup>vo35</sup> mutations  
 715 are indicated by the red triangle and red square, respectively.

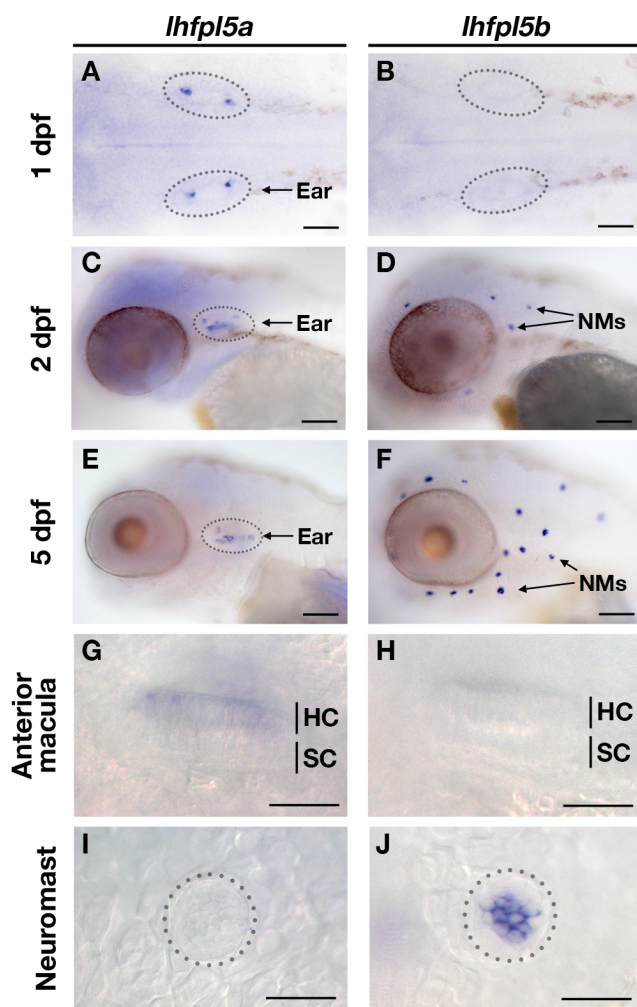

716

717 **Figure 2.** Zebrafish *lhfp15a* and *lhfp15b* genes are expressed in distinct populations of sensory hair  
718 cells. Whole mount mRNA *in situ* hybridization for *lhfp15a* (A, C, E, G, I) and *lhfp15b* (B, D, F, H, J)  
719 at 1, 2, and 5 days post-fertilization (dpf). Panels G - J are details from 5 dpf larvae. Abbreviations:  
720 NMs = neuromasts, HC = hair cell, SC = support cell. Scale bars: A, B = 50  $\mu$ m; C - F = 100  $\mu$ m; G -  
721 J = 25  $\mu$ m.

722

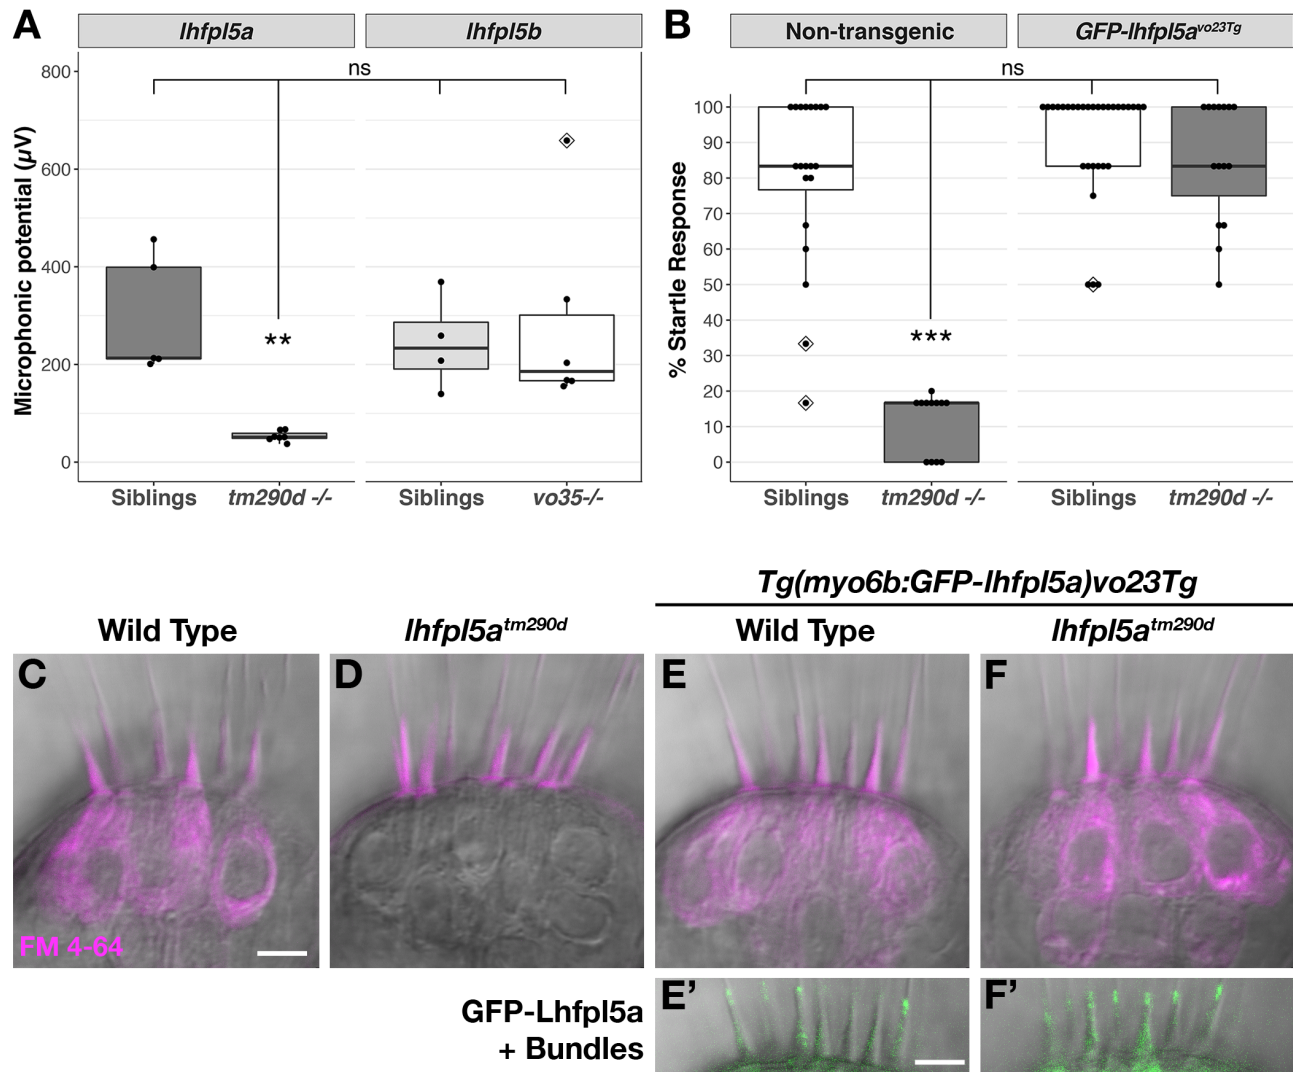

723

724 **Figure 3.** *lhfp15a* is required for auditory and vestibular hair cell function. (A) Boxplot showing the  
 725 first peak amplitude ( $\mu\text{V}$ ) of microphonic recordings from the inner ear of 3 dpf wild type, *lhfp15a* <sup>tm290d</sup>,  
 726 and *lhfp15b* <sup>vo35</sup> larvae. The boxes cover the inter-quartile range (IQR), and the whiskers represent the  
 727 minimum and maximum datapoints within 1.5 times the IQR. Values from individual larvae  
 728 are indicated by the black dots and outliers indicated by a diamond. Asterisks indicate  $p < 0.01$  (\*\*)  
 729 by Welch's t-test. ns = not significant. (B) Boxplot of the acoustic startle response in 6 dpf wild type  
 730 and *lhfp15a* <sup>tm290d</sup> mutants, with or without the *GFP-lhfp15a vo23Tg* transgene. Values from individual  
 731 larvae are indicated by the black dots and outliers indicated by a diamond. Asterisks indicate  $p < 0.001$   
 732 (\*\*\*) by Welch's t-test. ns = not significant. (C-F') FM 4-64 dye labeling assay for MET channel  
 733 activity of inner ear hair cells from 6 dpf larvae (C - Wild type (+/+ or +/-), D - *lhfp15a* <sup>tm290d</sup> mutants,  
 734 E - Wild type *GFP-lhfp15a vo23Tg*, F - *GFP-lhfp15a vo23Tg*; *lhfp15a* <sup>tm290d</sup>). E' and F' are images of  
 735 GFP-Lhfp15a protein in the bundle of the hair cells shown above in panels E and F. n = 2, 3, 12, and 4  
 736 for the genotypes in panels C-F, respectively. Scale bars = 5  $\mu\text{m}$  and apply to all images.

737

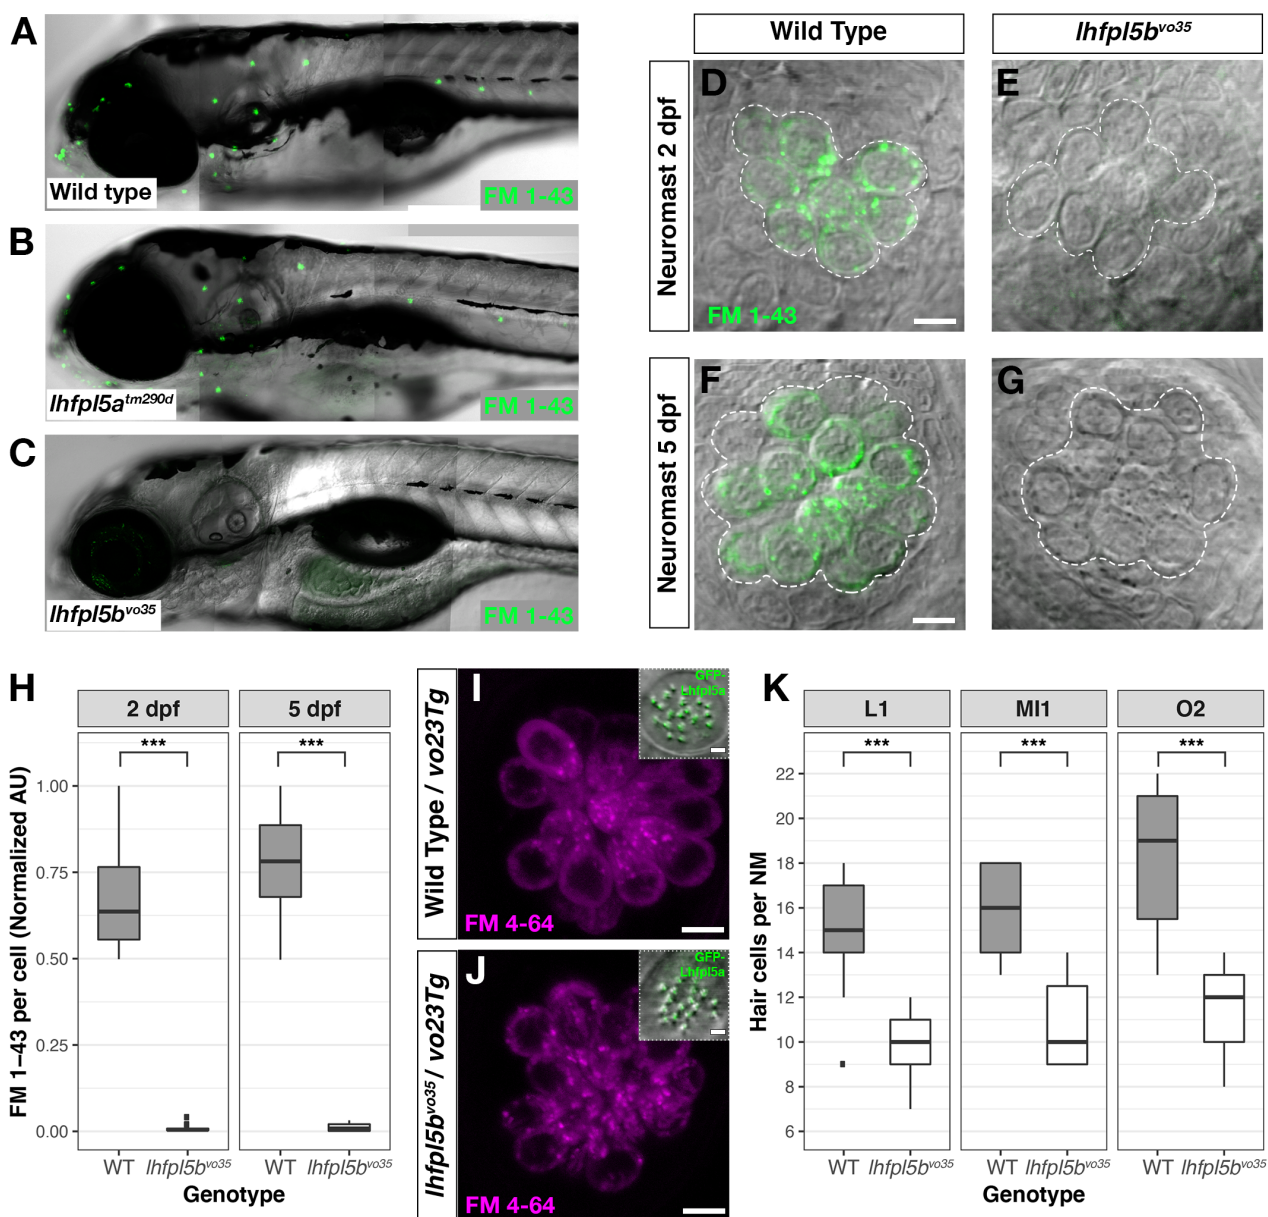

738

739 **Figure 4. *Ihfp15b* is required for lateral line hair cell function.** (A-C) Representative images of 5  
 740 dpf zebrafish larvae (A - Wild type; B - *lhfp15a<sup>tm290d</sup>*; C - *lhfp15b<sup>vo35</sup>*) labeled with the MET channel-  
 741 permeant dye FM 1-43. (D-G) Representative images of individual neuromasts from 2 dpf and 5 dpf  
 742 wild type and *lhfp15b<sup>vo35</sup>* larvae labeled with FM 1-43. Dashed lines outline the cluster of hair cells in  
 743 each neuromast. (H) Quantification of normalized FM 1-43 fluorescence intensity per hair cell of 2 dpf  
 744 and 5 dpf neuromasts (n = 10 WT, 14 *lhfp15b<sup>vo35</sup>* NMs at 2 dpf; n = 6 WT, 13 *lhfp15b<sup>vo35</sup>* NMs each  
 745 genotype at 5 dpf). The box plots cover the inter-quartile range (IQR), and the whiskers represent the  
 746 minimum and maximum datapoints within 1.5 times the IQR. Asterisks indicate p < 0.001 (\*\*\*) by  
 747 Welch's t-test. (I, J) Rescue of FM dye labeling in *lhfp15b<sup>vo35</sup>* mutants (n = 7) by the *GFP-lhfp15a*  
 748 (*vo23Tg*) transgene. The GFP-Lhfp15a bundle and FM 4-64 images are from the same NM for each  
 749 genotype. (K) Quantification of hair cell number in L1, MI1, and O2 neuromasts from 5 dpf *lhfp15b<sup>vo35</sup>*  
 750 mutants (n = 11) and wild-type siblings (n = 11). The box plots are the same as in H. Asterisks indicate  
 751 p < 0.001 (\*\*\*) by Welch's t-test. Scale bars = 5  $\mu$ m, applies to panels D-G, I, J; 2  $\mu$ m in I, J insets).

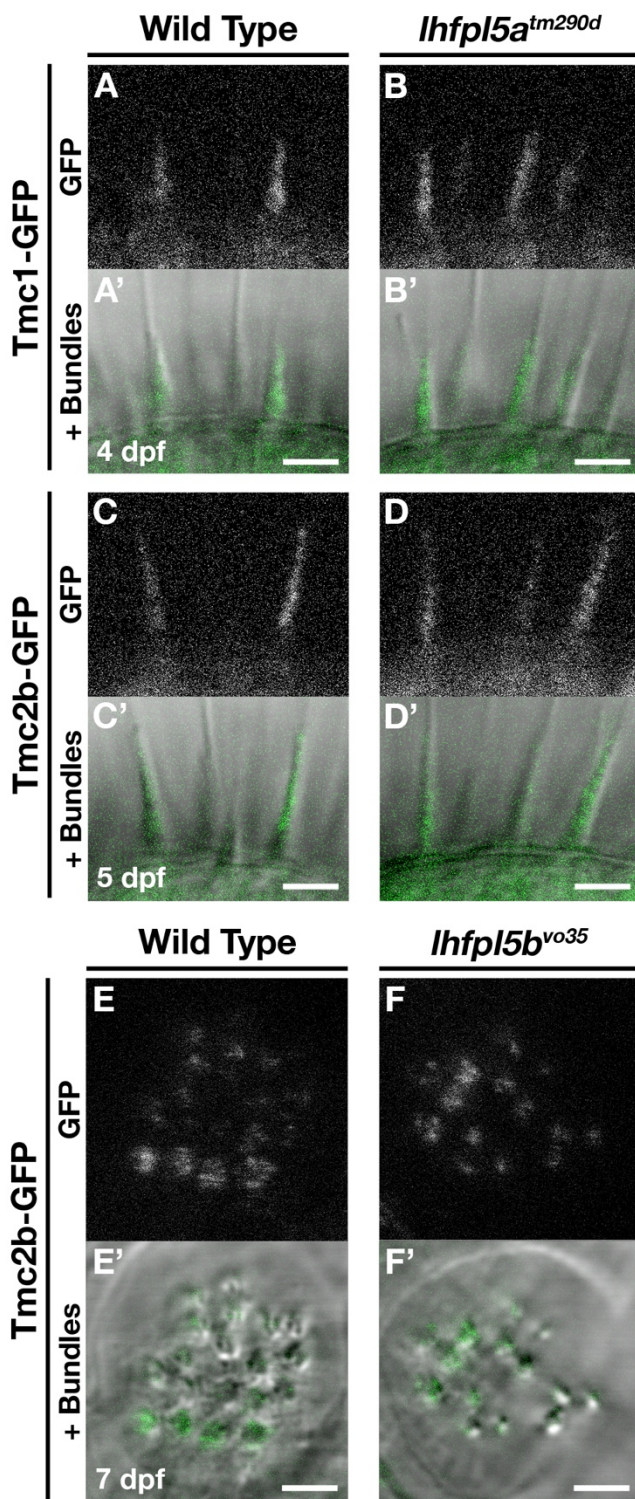

752

753 **Figure 5.** Tmc proteins do not require Lhfp15a or Lhfp15b for localization to the stereocilia of zebrafish  
754 hair cells. (A – D') Representative images of Tmc1-GFP (*vo27Tg*) or Tmc2b-GFP (*vo28Tg*) in the  
755 lateral cristae of wild type (A, A', C, C') and *lhfp15a<sup>tm290d</sup>* (B, B', D, D') larvae. The GFP-only channel  
756 is shown in panels A - D and overlaid with a light image of the bundles in A' - D'. (E – F')  
757 Representative images of Tmc2b-GFP (*vo28Tg*) in the neuromasts of wild type (E, E') and *lhfp15b<sup>vo35</sup>*  
758 (F, F') larvae. The GFP-only channel is shown in panels E and F and overlaid with a light image of  
759 the bundles in E' and F'. Scale bars = 3  $\mu$ m in all panels.

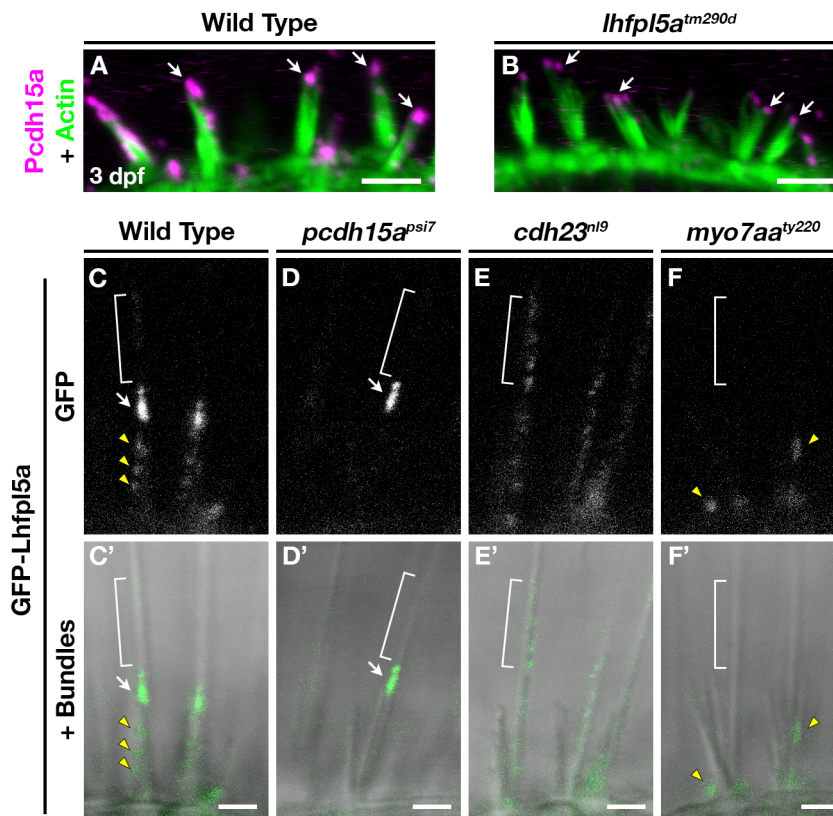

760

761 **Figure 6.** Lhfp15a requires MET complex proteins Pcdh15a, Cdh23, and Myo7a for normal localization  
 762 in the stereocilia of zebrafish hair cells. (A, B) Immunostain of Pcdh15a (magenta) in the lateral cristae  
 763 of wild type and *lhfp15a<sup>tm290d</sup>* mutants at 3 dpf. Phalloidin-stained actin of the hair bundle is shown in  
 764 green. Arrows indicate areas of Pcdh15a accumulation. (C-F') Representative images of GFP-Lhfp15a  
 765 (*vo23Tg*) in the lateral cristae hair bundles of wild type (C, C') and *pcdh15a<sup>psi7</sup>* (D, D'), *cdh23<sup>nl9</sup>* (E,  
 766 E'), and *myo7aa<sup>ty220</sup>* (F, F') mutants. White arrows indicate GFP signal in the presumptive kinocilial  
 767 linkages, yellow arrow heads indicate GFP signal in the stereocilia or the base of the hair bundle, and  
 768 brackets indicate GFP signal in the kinocilium. Scale bars = 3 μm in A, B; 2 μm in C-F'.



769 **Supplemental Table 1.** Lhfp15 proteins used to construct the phylogenetic tree in Figure 1A.

| Common name           | Species                       | Phylogenetic Order | Gene name      | Accession number     |
|-----------------------|-------------------------------|--------------------|----------------|----------------------|
| Seahorse              | <i>Hippocampus comes</i>      | Syngnathiformes    | <i>lhfp15a</i> | XP_019736131.1       |
|                       |                               |                    | <i>lhfp15b</i> | XP_019716386.1       |
| Salmon (Atlantic)     | <i>Salmo salar</i>            | Salmoniformes      | <i>lhfp15a</i> | XP_014021466.1       |
|                       |                               |                    | <i>lhfp15b</i> | XP_014002848.1       |
| Pufferfish            | <i>Takifugu rubripes</i>      | Tetraodontiformes  | <i>lhfp15a</i> | ENSTRUP00000020283.2 |
|                       |                               |                    | <i>lhfp15b</i> | ENSTRUP00000041734.2 |
| Platyfish             | <i>Xiphophorus maculatus</i>  | Cyprinodontiformes | <i>lhfp15a</i> | ENSXMAP00000020967.1 |
|                       |                               |                    | <i>lhfp15b</i> | ENSXMAP00000010306.1 |
| Medaka                | <i>Oryzias latipes</i>        | Beloniformes       | <i>lhfp15a</i> | ENSORLP00000042616.1 |
|                       |                               |                    | <i>lhfp15b</i> | ENSORLP00000008018.2 |
| Zebrafish             | <i>Danio rerio</i>            | Cypriniformes      | <i>lhfp15a</i> | ENSARP00000066188.3  |
|                       |                               |                    | <i>lhfp15b</i> | ENSARP00000073423.4  |
| Cavefish (Blind)      | <i>Astyanax mexicanus</i>     | Characiformes      | <i>lhfp15a</i> | ENSAMXP00000035004.1 |
|                       |                               |                    | <i>lhfp15b</i> | ENSAMXP00000007271.2 |
| Stickleback (3-spine) | <i>Gasterosteus aculeatus</i> | Gasterosteiformes  | <i>lhfp15a</i> | ENSGACP00000010149.1 |
|                       |                               |                    | <i>lhfp15b</i> | ENSGACP00000010766.1 |
| Tilapia               | <i>Oreochromis niloticus</i>  | Cichliformes       | <i>lhfp15a</i> | ENSONIP00000024352.1 |
|                       |                               |                    | <i>lhfp15b</i> | ENSONIP00000014897.1 |
| Perch (Climbing)      | <i>Anabas testudineus</i>     | Perciformes        | <i>lhfp15a</i> | ENSATEP00000035217.1 |
|                       |                               |                    | <i>lhfp15b</i> | ENSATEP00000029406.1 |
| Eel (Zig-zag)         | <i>Mastacembelus armatus</i>  | Synbranchiformes   | <i>lhfp15a</i> | ENSMAMP00000013383.1 |
|                       |                               |                    | <i>lhfp15b</i> | ENSMAMP00000016042.1 |
| Cod                   | <i>Gadus morhua</i>           | Gadiformes         | <i>lhfp15a</i> | ENSGMOP00000012109.1 |
|                       |                               |                    | <i>lhfp15b</i> | ENSGMOP00000016613.1 |
| Pike (Northern)       | <i>Esox lucius</i>            | Esociformes        | <i>lhfp15a</i> | ENSELUP00000020567.1 |
|                       |                               |                    | <i>lhfp15b</i> | ENSELUP00000014071.1 |
| Spotted gar           | <i>Lepisosteus oculatus</i>   | Lepisosteiformes   | <i>lhfp15</i>  | ENSLOCP00000013703.1 |
| Xenopus               | <i>Xenopus tropicalis</i>     | Anura              | <i>lhfp15</i>  | ENSXETP00000058779.1 |
| Chicken               | <i>Gallus gallus</i>          | Galliformes        | <i>lhfp15</i>  | ENSGALP00000053562.1 |
| Mouse                 | <i>Mus musculus</i>           | Rodentia           | <i>lhfp15</i>  | ENSMUSP00000156557.1 |
| Human                 | <i>Homo sapiens</i>           | Primates           | <i>lhfp15</i>  | ENSP00000493955.1    |

770

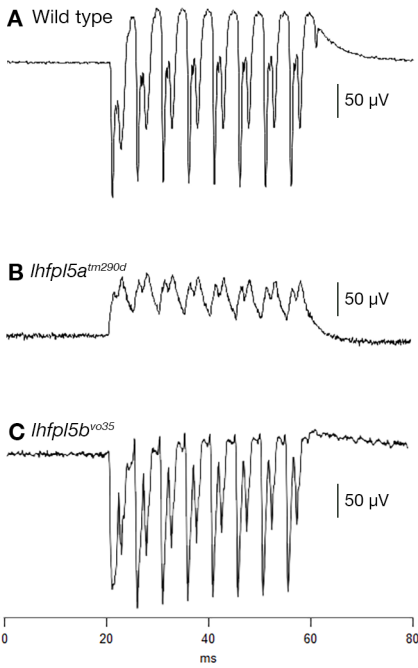

**D**

| Genotype                        | n | Mean   | Median | Std. Dev. | 25-75 pctl.     |
|---------------------------------|---|--------|--------|-----------|-----------------|
| Siblings ( <i>tm290d</i> )      | 5 | 296.20 | 213.02 | 121.76    | 211.57 - 399.02 |
| <i>lhfp15a<sup>tm290d</sup></i> | 7 | 53.06  | 51.14  | 10.48     | 48.83 - 59.05   |
| Siblings ( <i>vo35</i> )        | 4 | 243.84 | 233.35 | 96.74     | 190.78 - 286.41 |
| <i>lhfp15b<sup>vo35</sup></i>   | 6 | 280.86 | 185.64 | 196.47    | 166.67 - 301.01 |

771

772 **Supplemental Figure 1.** Representative microphonic traces from the inner ears of 3 day-old wild type  
 773 (A), *lhfp15a<sup>tm290d</sup>* (B), and *lhfp15b<sup>vo35</sup>* (C) larvae. D – Table of the n-values, mean, median, standard  
 774 deviation, and 25 - 75 percentile values for the first peak microphonic values graphed in Figure 3A.

775

776

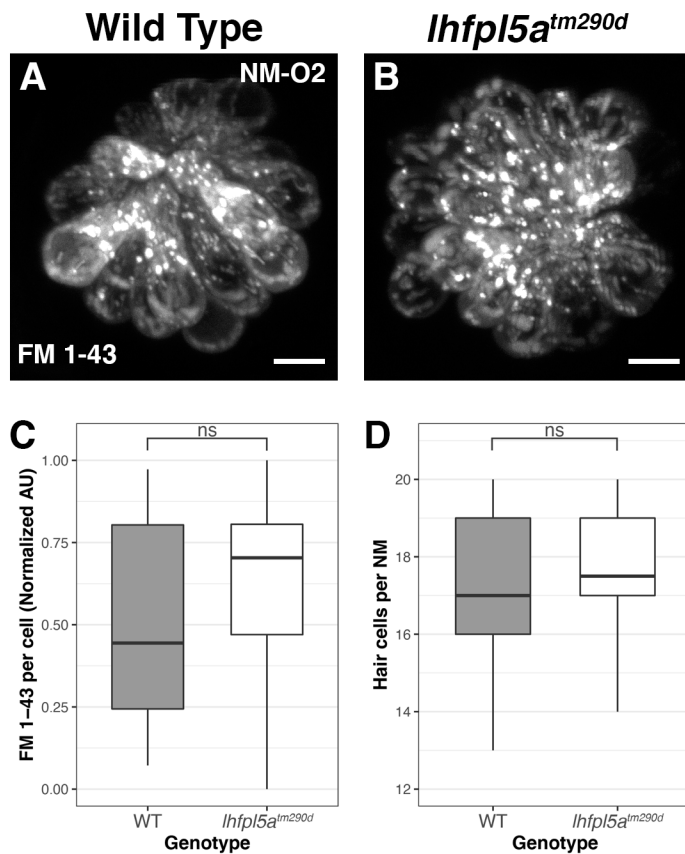

777

778 **Supplemental Figure 2.** Comparison of basal MET channel activity in neuromasts from wild type and  
779 *lhfp15a*<sup>tm290d</sup> mutant larvae. (A, B) Representative images of FM 1-43 fluorescence in lateral line  
780 neuromasts from wild type (A) and *lhfp15a*<sup>tm290d</sup> (B) mutants at 5 dpf. (C) Quantification of normalized  
781 FM 1-43 fluorescence intensity per hair cell in 5 dpf neuromasts (n = 6 WT, 6 *lhfp15a*<sup>tm290d</sup> larvae, 3  
782 NMs per larvae). The box plots cover the inter-quartile range (IQR), and the whiskers represent the  
783 minimum and maximum datapoints within 1.5 times the IQR. p = 0.2229; ns = not significant. (D)  
784 Quantification of hair cell number in neuromasts from 5 dpf *lhfp15a*<sup>tm290d</sup> mutants and wild-type  
785 siblings, as determined by counting FM-positive hair cells. The same larvae and neuromasts were used  
786 as in C. p = 0.5828; ns = not significant by Welch's t-test.

787

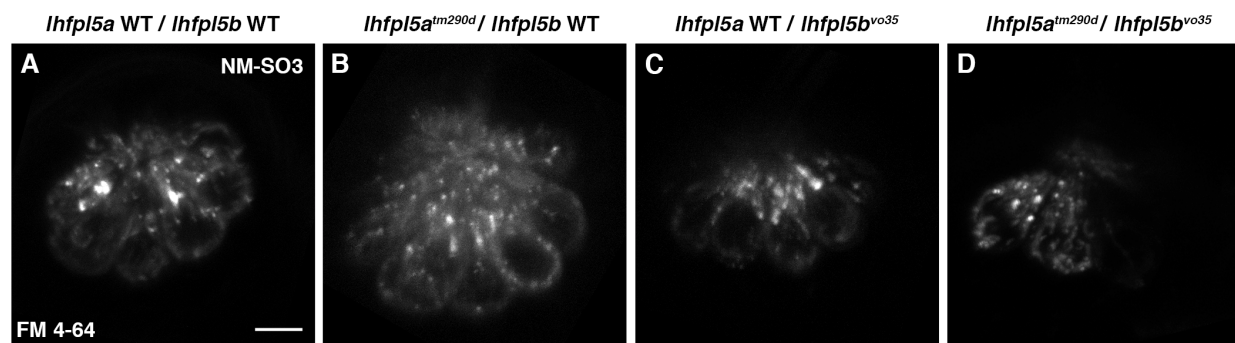

788

789 **Supplemental Figure 3.** Examples of residual basal MET channel activity in the SO3 neuromast hair  
790 cells of *lhfp15b*<sup>vo35</sup> mutants and *lhfp15a*<sup>tm290d</sup>; *lhfp15b*<sup>vo35</sup> double mutants. FM 4-64 labeled SO3  
791 neuromasts from wild type (A), *lhfp15a*<sup>tm290d</sup> (B), *lhfp15b*<sup>vo35</sup> (C), and *lhfp15a*<sup>tm290d</sup>; *lhfp15b*<sup>vo35</sup> (D)  
792 larvae at 5 dpf. Scale bar = 5 μm, applies to all panels.

793

794

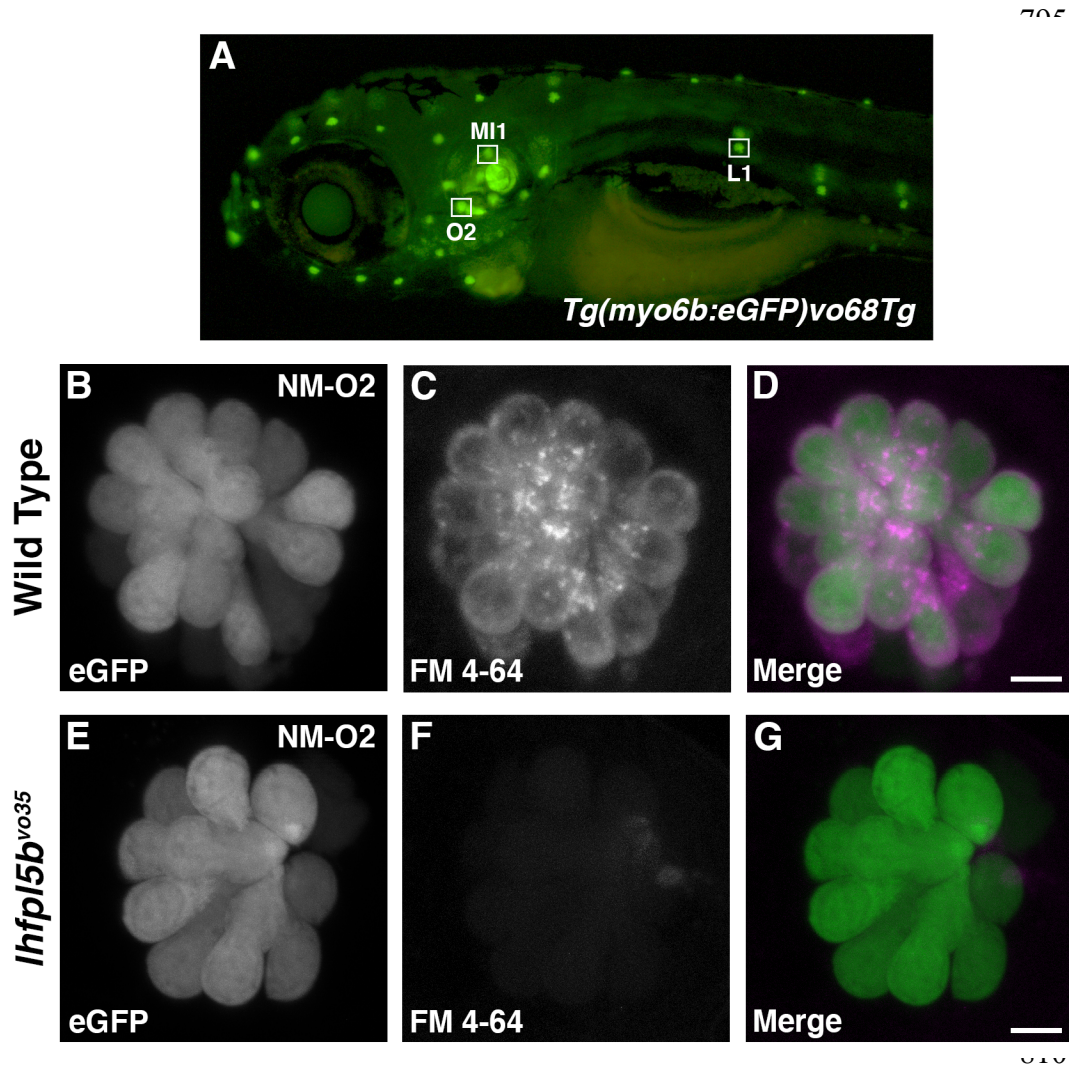

811 **Supplemental Figure 4.** (A) *Tg(myo6b:GFP)vo68Tg* larvae at 5 dpf. The neuromasts used for hair  
812 cell counting are labeled. (B – G) Representative images of GFP and FM 4-64-labeled hair cells in 5  
813 dpf wild type and *lhfp15b*<sup>vo35</sup> mutant *Tg(myo6b:GFP)vo68Tg* larvae. These images are from larvae  
814 that make up part of the data set quantified in Figure 4K. Scale bars = 5 μm.

815

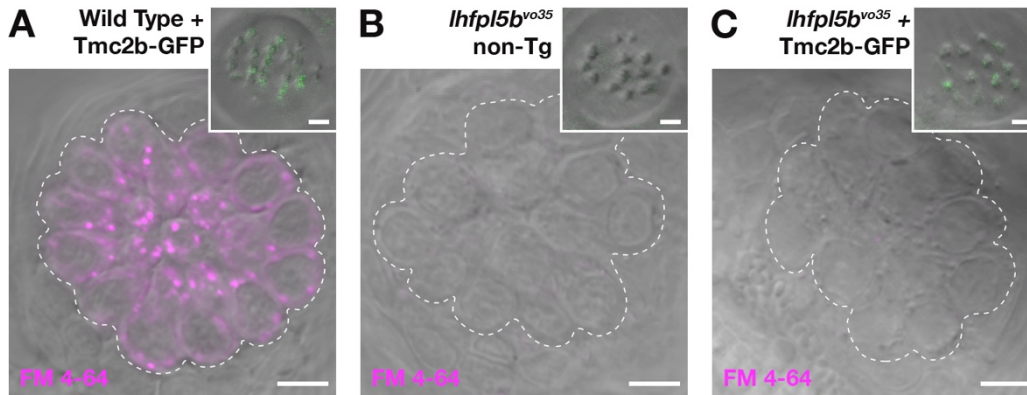

816

817 **Supplemental Figure 5.** Bundle-localized Tmc2b-GFP does not restore basal MET channel activity  
818 to neuromast hair cells of *lhfp15b*<sup>vo35</sup> mutants. (A-C) Representative images of neuromasts labeled with  
819 FM 4-64 from wild type Tmc2b-GFP *vo28Tg* (A), non-transgenic *lhfp15b*<sup>vo35</sup> (B), and *vo28Tg*;  
820 *lhfp15b*<sup>vo35</sup> (C) larvae at 7 dpf. Dashed lines outline the cluster of hair cells in each neuromast. Insets  
821 show the neuromast hair bundles from the same neuromast in the main panel. Scale bars = 5 μm in A-  
822 C; 2 μm for the bundle insets.

823

824

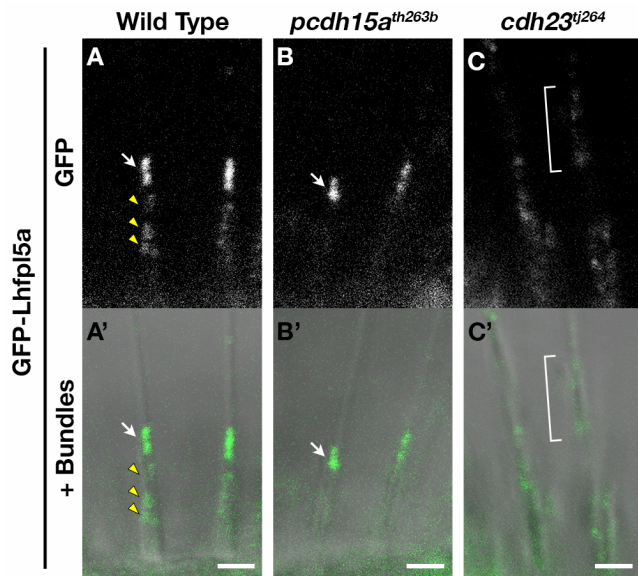

825

826 **Supplemental Figure 6.** Mislocalization of GFP-Lhfpl5a in different mutant alleles of *pcdh15a* and  
827 *cdh23* as shown in Figure 6. Representative images of GFP-Lhfpl5a (*vo23Tg*) in the lateral cristae hair  
828 bundles of wild type (A, A') and *pcdh15a*<sup>th263b</sup> (B, B'), and *cdh23*<sup>tj264</sup> (C, C') mutants. The GFP-only  
829 channel is shown in panels A - C and overlaid with a light image of the bundles in A' - C'. White  
830 arrows indicate GFP signal in the presumptive kinocilial linkages, yellow arrow heads indicate GFP  
831 signal in the stereocilia, and brackets indicate GFP signal in the kinocilium. Scale bars = 2 μm in A-  
832 C'.

833

834

835

836
